1 **TGF- $\beta$  induced CXCL13 in CD8+ T cells is associated with tertiary lymphoid structures in**  
2 **cancer**

3

4 HH Workel<sup>1,2</sup>, JM Lubbers<sup>1,2</sup>, R Arnold<sup>3</sup>, T Prins<sup>1</sup>, P van der Vlies<sup>4</sup>, K de Lange<sup>4</sup>, T Bosse<sup>5</sup>, I van  
5 Gool<sup>5</sup>, FA Eggink<sup>1</sup>, MCA Wouters<sup>6</sup>, FL Komdeur<sup>1</sup>, CL Creutzberg<sup>7</sup>, A Kol<sup>1</sup>, A Plat<sup>1</sup>, M Glaire<sup>8</sup>, DN  
6 Church<sup>8</sup>, HW Nijman<sup>1,9</sup>, M de Bruyn<sup>1,9,\*</sup>

7 <sup>1</sup>University of Groningen, University Medical Center Groningen, Department of Obstetrics and  
8 Gynecology, The Netherlands

9 <sup>2</sup>Authors share first authorship

10 <sup>3</sup>Institute of Cancer and Genomic Sciences, University of Birmingham, Birmingham, United Kingdom

11 <sup>4</sup>University of Groningen, University Medical Center Groningen, Department of Genetics, The  
12 Netherlands

13 <sup>5</sup>Leiden University, Leiden University Medical Center, Department of Pathology, The Netherlands

14 <sup>6</sup>Trev and Joyce Deeley Research Centre, BC Cancer, Victoria, British Columbia, Canada

15 <sup>7</sup>Leiden University, Leiden University Medical Center, Department of Radiation Oncology, The  
16 Netherlands

17 <sup>8</sup>University of Oxford, Molecular and Population Genetics Laboratory, The Wellcome Trust Centre for  
18 Human Genetics and Oxford Cancer Centre, United Kingdom

19 <sup>9</sup>Authors share senior authorship

20

21 **\*Corresponding author:**

22 Marco de Bruyn, PhD

23 University Medical Center Groningen

24 CMC V, 4e floor, room Y4.240

25 PO 30.001

26 9700 RB Groningen

27 Tel + 31 (0)50 3613174

28 Fax + 31 (0)50 3611806

29 Email [m.de.bruyn@umcg.nl](mailto:m.de.bruyn@umcg.nl)

30

31 **Keywords:** CXCL13, TGF- $\beta$ 1, tertiary lymphoid structures, CD8+ T cell, CD103+ T cell, immune

32 checkpoint blockade, neo-antigens, cancer

33 **Abstract**

34 Coordinated immune responses against human tumors are frequently characterized by tertiary  
35 lymphoid structures (TLS) which predict improved prognosis. The development of TLS is dependent  
36 on the chemokine CXCL13, reported to be secreted by dendritic cells and follicular helper T cells only.  
37 We report the unexpected finding that CXCL13 is also secreted by activated CD8+ T cells following  
38 stimulation by transforming growth factor beta (TGF- $\beta$ ). Using single cell RNA sequencing we found  
39 that expression of *CXCL13* in CD8+ T cells was restricted to the intraepithelial CD103+ population.  
40 Accordingly, CD8+ T cells activated in the presence of TGF- $\beta$  simultaneously upregulated CD103 and  
41 secreted CXCL13. *CXCL13* expression was strongly correlated with neo-antigen burden and cytolytic  
42 gene signatures in bulk tumors. In line with this, TLS were abundant in neo-antigen-high, CD103+ T  
43 cell-enriched tumors. TGF- $\beta$  thus appears to play a role in coordinating immune responses against  
44 human tumors through CD8-dependent CXCL13-associated formation of TLS.

## 45 **Background**

46 Immune checkpoint inhibitors targeting programmed death ligand 1 (PDL1) or its receptor,  
47 programmed death 1 (PD-1), have elicited unprecedented long-term disease remissions in advanced  
48 and previously treatment-refractory cancers<sup>1-5</sup>. Unfortunately, only a subset of patients currently  
49 benefit from treatment. Immune checkpoint inhibitors are more likely to be effective in patients with a  
50 pre-existing anti-cancer immune response; most notably a CD8+ cytotoxic T cell response against  
51 tumor neo-antigens<sup>6</sup>.

52 Responsive tumors harbor significantly more predicted neo-antigens<sup>7,8</sup> and display evidence  
53 of a highly-coordinated immune response comprising T cells, dendritic cells and B cells<sup>9</sup>. In diseases  
54 that parallel tumor development such as chronic inflammatory conditions, this coordinated infiltration  
55 by different immune cell subsets is frequently associated with tertiary lymphoid structures (TLS) – an  
56 ectopic form of lymphoid tissue. TLS exhibit features of regular lymph nodes, including high  
57 endothelial venules, a T cell zone with mature dendritic cells (DCs) and a germinal center with  
58 follicular DCs and B cells<sup>10</sup>. Several studies have reported the presence of TLS in tumors, which was  
59 generally found to be associated with greater immune control of cancer growth and improved  
60 prognosis<sup>11-14</sup>. Furthermore, it was found for several malignancies that particularly the combination of  
61 TLS presence with high CD8+ T cell infiltration was associated to superior prognosis, whereas the  
62 presence of high CD8+ T cell infiltration alone was associated to poor or moderate prognosis<sup>15,16</sup>.  
63 These observations highlight the importance of a coordinated immune response, including TLS  
64 formation, in anti-cancer immunity.

65 To date, the molecular determinants of tumor TLS formation remain incompletely understood.  
66 Current data suggest that TLS formation results from a complex interplay between DCs, T cells, B  
67 cells and supporting stromal cells, with reciprocal signaling between these cells mediated by  
68 cytokines including chemokine [C-X-C motif] ligand 13 (CXCL13), receptor activator of nuclear factor  
69  $\kappa$  B (ligand)(RANK/RANKL), lymphotoxin  $\alpha\beta$  (LT $\alpha\beta$ ) and chemokine (C-C motif) ligand 21  
70 (CCL21)<sup>17,18</sup>. A central role for CXCL13 in this process is suggested by the inability of CXCL13-  
71 knockout mice to enable homing and accumulation of B cells into lymphoid aggregates<sup>19</sup> and  
72 generate functional lymphoid tissue<sup>20,21</sup>, and the observation that CXCL13 alone is sufficient to  
73 generate lymphoid tissue<sup>22-24</sup>. Nevertheless, a key outstanding question remains whether tumor-



74 associated TLS are formed in response to the general inflammatory character of the tumor micro-  
75 environment, or rather, are induced by (neo-)antigen-specific adaptive immunity.

76 Here, we report on the unexpected finding that human tumor-infiltrating CTLs can produce  
77 CXCL13, linking adaptive immune activation to the formation of TLS. Notably, induction of CXCL13 in  
78 CTLs was dependent on concurrent T cell receptor (TCR)- and TGF- $\beta$  receptor-signaling and was  
79 paralleled by upregulation of CD103, a marker for tissue-resident CTLs. Accordingly, the presence of  
80 CD103+ CTLs was strongly correlated to *bona fide* TLS in tumors with a high mutational load. This  
81 discovery sheds new light on how TLS could be induced by CTLs, identifying a novel role for CTLs in  
82 the orchestration of a coordinated immune response against human (neo-)antigen-rich tumors. In  
83 addition, our finding identifies CD103 and TLS as potential new biomarkers for immune checkpoint  
84 inhibitors in epithelial malignancies.

85 **Results**

86 Tertiary lymphoid structures are associated with high mutational load and increased cytotoxic T cell  
87 responses

88 Conflicting reports exist on the link between neo-antigen load and the presence of tertiary lymphoid  
89 structures (TLS)<sup>16,25</sup>. Therefore, we first assessed whether tumors with a high mutational load were  
90 enriched for TLS-associated genes in mRNA sequencing data from The Cancer Genome Atlas  
91 (TCGA). Across malignancies, a previously reported TLS gene signature<sup>13</sup> was enriched in tumors  
92 with high numbers of mutations (Figure 1A). Interestingly, differences in expression of TLS genes was  
93 also observed in uterine cancer according to their molecular classification. In brief, four distinct  
94 molecular subtypes can be distinguished in uterine cancer: microsatellite stable (MSS), microsatellite  
95 unstable (MSI), Polymerase Epsilon Exonuclease Domain Mutated (*POLE*-EDM) tumors and p53-  
96 mutant tumors. We have previously demonstrated an increased number of mutations, predicted neo-  
97 antigens and cytotoxic T lymphocytes (CTLs) in *POLE*-EDM and MSI tumors compared to MSS<sup>26</sup>. In  
98 line with the above, MSS tumors mostly lacked TLS-related genes, while MSI and *POLE*-EDM tumors  
99 were highly enriched for TLS genes (Figure 1B). To confirm these findings, we further analyzed an  
100 independent cohort of MSS, MSI and *POLE*-EDM tumors for the presence of TLS by  
101 immunohistochemistry. In line with the TCGA data, only 48% (20/42) of MSS tumors were found to  
102 have TLS, whereas 74% (28/38) of MSI and 92% (33/36) of *POLE*-EDM tumors contained TLS  
103 (Exemplified in Figure 2A). Moreover, quantification per tumor revealed a significant increase in the  
104 number of TLS when comparing MSS to *POLE*-EDM and MSI to *POLE*-EDM tumors (Figure 2B,  
105  $p < 0.001$  and  $p < 0.01$ , respectively). To confirm that the observed CD20+ structures were *bona fide*  
106 TLS, we performed multi-color immunofluorescence. The structures we observed contained all  
107 characteristics of lymphoid tissue, as determined by the presence of high endothelial venules (HEVs),  
108 germinal B cell centers and dendritic cells (DCs) surrounded by a rim of T cells (Figure 2C). In  
109 accordance with the link between TLS and mutational load, we also identified a correlation between  
110 TLS-associated genes and CTL characteristics in TCGA data (Figure 3). Taken together, our findings  
111 suggest a link between mutational load, corresponding CTL responses and formation of TLS in  
112 human cancer.

113

114 Epithelial localization of tumor-infiltrating CD8+ T cells is associated with an activated and exhausted  
115 transcriptional signature

116 Based on the observation that TLS-gene expression was higher in tumors with high mutational load  
117 and high CD8+ T cell infiltration, we hypothesized that tumor-reactive CTLs might be involved in the  
118 formation of TLS in cancer. To address this hypothesis, we performed mRNA sequencing on single-  
119 and 20-cell pools of CD8+ T cells isolated from human tumors. As the association between tumor  
120 mutational load, CTLs and TLS was uniform across malignancies, we chose ovarian cancer as our  
121 model tumor for the sequencing because of its large tumor bulk, high number of infiltrating, neo-  
122 antigen recognizing CD8+ cells and documented presence of TLS<sup>16,27</sup>. As TLS are frequently found  
123 within the tumor stroma, we also distinguished stromal from intraepithelial CD8+ T cells using the  $\alpha$ E  
124 integrin subunit (CD103). We and others have previously shown that intraepithelial, but not stromal,  
125 CD8+ CTLs express CD103<sup>28-31</sup>. In line with this, TLS associated T cells were negative for CD103  
126 (Figure 2C). CTLs were defined based on a CD3+/TCR $\alpha\beta$ + /CD8 $\alpha\beta$ + /CD56- /CD4- phenotype (Figure  
127 4). Post hoc t-distributed stochastic neighbor embedding (t-SNE) confirmed the presence of unique  
128 CD103+ and CD103- CTL populations in these tumors that were correctly identified by manual gating  
129 during isolation (Figure 5A). Importantly, the transcriptome of CD103+ CTLs was characterized by a  
130 marked activation and exhaustion signature with significant upregulation of *GZMB* (Granzyme B),  
131 *HAVCR2* (T cell Immunoglobulin and Mucin Domain 3, TIM3), *LAG3* (Lymphocyte-Activation Gene 3),  
132 *TNFRSF18* (Glucocorticoid-Induced TNFR-related Protein, GITR), *KIR2DL4* (Killer cell  
133 Immunoglobulin-like Receptor 2DL4), *TIGIT* (T cell Immunoreceptor with Ig and ITIM Domain) and  
134 *CTLA4* (Cytotoxic T-Lymphocyte Attenuator 4) in the 20-cell pools (Figure 5B and 5C). In addition,  
135 CD103+ CTLs expressed *GNGT2* (G Protein Subunit Gamma Transducin 2), encoding a G protein  
136 gamma family member expressed in lymph nodes and spleen that is involved in GTPase activity  
137 (Figure 5B). Differential expression of many of these markers was also observed in the single cell  
138 data (Figure 5D). The expression of these markers are in line with our earlier work demonstrating that  
139 the intraepithelial CD103+ cells represent CTLs that have undergone activation and/or exhaustion<sup>28,29</sup>.  
140 By contrast, CD103- CTLs displayed a more quiescent phenotype with a notable high differential  
141 expression of the V-Set Domain Containing T Cell Activation Inhibitor 1 (*VTCN1*), a known suppressor  
142 of T cell function (Figure 5B). In addition, these cells differentially expressed *GAGE12H*, *GAGE12I*,

143 and *GMPR2* (Guanosine Mono Phosphate Reductase 2), involved in cell energy metabolism (Figure  
144 5B).

145

146 CD103+ CTLs differentially express the B cell recruiting chemokine CXCL13.

147 In addition to the activated and exhausted gene signature, CD103+ CTLs were also characterized by  
148 a significantly upregulated expression of the TLS-inducing chemokine [C-X-C motif] ligand 13  
149 (*CXCL13*)(Figure 5C  $p < 0.0001$  and Figure 5D  $p = 0.02$ ). This finding is of interest, as *CXCL13* is  
150 traditionally described as the prototypical CD4+ follicular helper T cell gene and since it plays a  
151 dominant role in TLS formation via recruitment of B cells and TFH through C-X-C chemokine receptor  
152 type 5 (CXCR5)<sup>32,33</sup>. In accordance, *CXCL13* mRNA expression in uterine cancer was substantially  
153 higher in TCGA data of TLS-rich MSI and POLE-EDM tumors (Figure 1B). Since the expression of  
154 *CXCL13* in CD103+ CTLs was unexpected, we next determined whether *CXCL13* gene expression  
155 was more strongly associated with CTLs, CD8+, CD4+ or follicular helper T cell gene signatures in  
156 two gynecological malignancies, uterine and ovarian cancer. In line with our data, *CXCL13* high  
157 ovarian tumors (>median *CXCL13* expression) were strongly enriched for a CTL signature  
158 (Enrichment Score (ES) 0.93,  $p < 0.0001$ ). By contrast, the enrichment for total CD8+, CD4+, and TFH  
159 cell signatures was considerably lower in *CXCL13* high ovarian tumors (ES 0.72, ES 0.74, ES 0.59,  
160 respectively, all  $p < 0.0001$ ). Similar results were obtained in endometrial cancer (CTL ES 0.86, CD8  
161 ES 0.75, CD4 ES 0.75, TFH ES 0.73. In line with the observed enrichment of *CXCL13* mRNA in  
162 prognostically beneficial CD103+ CTLs, *CXCL13* gene expression was associated with a significantly  
163 improved prognosis in ovarian and uterine cancer (ovarian  $p = 0.0188$ , ovarian no residual disease  
164  $p = 0.0394$ , uterine  $p = 0.00869$ ). As such, our data suggests CD8+ T cells may aid the formation of TLS  
165 through CXCL13.

166

167 TGF- $\beta$  primes cytotoxic CD8+ T cells to secrete CXCL13 *in vitro*

168 As CD8+ T cells expressed *CXCL13* mRNA *in situ*, we proceeded to study whether tumor-infiltrating  
169 lymphocytes could indeed produce *CXCL13* protein. CD103+ CTLs isolated from tumors of three  
170 ovarian cancer patients readily secreted *CXCL13* upon *ex vivo* activation with anti-CD3/anti-CD28-  
171 conjugated beads or PMA/Ionomycin (Figure 6A). Next, we sought to define the molecular  
172 mechanism underlying the production of *CXCL13*. Previously, we and others have demonstrated that

173 induction of CD103 in CD8+ T cells is dependent on concurrent T cell receptor (TCR) and  
174 Transforming Growth Factor Beta (TGF- $\beta$ ) receptor 1 (TGF- $\beta$ R1) signaling<sup>29,34,35</sup>. The previously  
175 reported role of TGF- $\beta$  in inducing exhaustion related genes such as PD-1 in T cells<sup>36</sup> is also in line  
176 with the transcriptional profile that we obtained for CD103+ CTLs. Therefore, we hypothesized that  
177 TGF- $\beta$  might prime activated peripheral blood CD8+ CTLs to secrete CXCL13. To investigate this, we  
178 activated peripheral blood CD8+ T cells from healthy donors with anti-CD3/anti-CD28-conjugated  
179 beads in the presence or absence of recombinant TGF- $\beta$ 1 (rTGF- $\beta$ 1) and measured secretion of  
180 CXCL13. Activation of CD8+ T cells alone did not induce CD103 surface-expression (Figure 6B), nor  
181 the production and secretion of CXCL13 (Figure 6C). However, in the presence of rTGF- $\beta$ 1, activated  
182 CD8+ T cells expressed CD103 on their surface (Figure 6B) and secreted high levels of CXCL13  
183 (Figure 6C). Expression of CD103 and secretion of CXCL13 was inhibited by co-incubation with a  
184 TGF- $\beta$ R1 inhibitor (Figure 6B and 6C). Similar results were obtained when CD8+ T cells were  
185 activated using phytohaemagglutinin (PHA) (data not shown). As interleukin 2 (IL2) inhibits the  
186 secretion of CXCL13 in follicular helper CD4+ T cells<sup>32</sup>, we also examined whether IL2 impacted  
187 CXCL13 secretion by CD8+ T cells. In contrast to CD4+ cells, induction of CXCL13 in CD8+ T cells  
188 was not inhibited by IL2 (Figure 6D). Next, we assessed the dose-response relationship between  
189 TGF- $\beta$  and CXCL13 production and found that CXCL13 production was already significantly induced  
190 in activated CD8+ T cells at 0,1 ng/mL TGF- $\beta$  and peaked at 10 ng/mL TGF- $\beta$  (Figure 6E). Thus,  
191 based on our findings, we conclude that low concentrations of TGF- $\beta$  are already sufficient for  
192 CXCL13 induction in CD8+ T cells. Off note, CD8+ T cells that were stimulated long-term with beads,  
193 TGF $\beta$  and IL2 maintained the ability to produce CXCL13 chemokine (not shown). To determine  
194 whether TGF- $\beta$  also primes activated T cells for the secretion of other chemokines, we analyzed  
195 release of 47 chemokines from CD8+ T cells in the presence or absence of rTGF- $\beta$ 1 using two  
196 independent chemokine arrays (Figure 6E and 6F). As anticipated, CXCL13 was induced specifically  
197 upon activation of T cells in the presence of rTGF- $\beta$ 1 (Figure 6E). By contrast, no other chemokines  
198 were dependent on rTGF- $\beta$ 1 for their induction. Nevertheless, rTGF- $\beta$ 1 did appear to consistently  
199 increase the activation-dependent release of a number of chemokines. Most notably, we observed an  
200 increase in the release of chemokine (C-C motif) ligand 17 (CCL17) and chemokine (C-C motif) ligand  
201 20 (CCL20), which are both genes that are involved in functional TLS formation (Figure 6F). In  
202 conclusion, we found that TGF- $\beta$  is a specific inducer of CXCL13 production in CD8+ T cells.

203

204 Tertiary lymphoid structures are associated with the CD103<sup>+</sup> CD8<sup>+</sup> T cell gene signature

205 Based on the above, we speculated that activation of CD8<sup>+</sup> T cell in the presence of TGF- $\beta$  *in situ*  
206 would result in the induction of TLS across human epithelial tumors. As such, tumors rich in CD103<sup>+</sup>  
207 CD8<sup>+</sup> T cells should accumulate more TLS than tumors in which this T cell population is scarce. To  
208 assess this, we analyzed TCGA mRNA expression data of ovarian, uterine, lung and breast cancer  
209 using the CD103<sup>+</sup>CD8<sup>+</sup> and CD103<sup>-</sup>CD8<sup>+</sup> T cell gene signatures identified by our mRNA sequencing.  
210 The TLS gene signature was strongly correlated to CD103<sup>+</sup>CD8<sup>+</sup> T cell genes, but not to CD103-  
211 CD8<sup>+</sup> T cell gene signatures across all four tumor types (Figure 7). In line with our data, CXCL13-high  
212 ovarian tumors (>median CXCL13 gene expression) were strongly enriched for a CD103<sup>+</sup>CD8<sup>+</sup>  
213 signature (Enrichment Score (ES) 0.83,  $p < 0.0001$ ). By contrast, there was no enrichment for CD103<sup>-</sup>  
214 CD8<sup>+</sup> genes in CXCL13-high ovarian tumors (ES 0.26,  $P = 0.36$ ). Similar results were obtained in  
215 uterine cancer (CD103<sup>+</sup>CD8<sup>+</sup> signature ES 0.88,  $P < 0.0001$ , CD103<sup>-</sup>CD8<sup>+</sup> signature ES 0.20,  $P = 0.88$ ).  
216 Taken together, our data demonstrates TGF- $\beta$ 1 primes CD8<sup>+</sup> T cells to produce and secrete  
217 CXCL13, and may therefore promote the formation of TLS.

## 218 Discussion

219 In this study we report on the unexpected finding that transforming growth factor beta (TGF- $\beta$ )  
220 stimulates activated CD8+ T cells to produce chemokine (C-X-C motif) ligand 13 (CXCL13), a known  
221 inducer of tertiary lymphoid structures (TLS)<sup>22-24</sup>. This production of CXCL13 was paralleled by the  
222 induction of CD103 on the cell surface of CD8+ cells *in vitro*. Further, CD103+ cytotoxic T  
223 lymphocytes (CTLs) isolated directly from human tumors strongly expressed CXCL13 mRNA and  
224 secreted CXCL13 protein upon *ex vivo* reactivation. Notably, the presence of TLS gene signatures  
225 was strongly increased in highly mutated, CD103+ T cell-enriched human tumors from The Cancer  
226 Genome Atlas (TCGA). Further, the absolute number of TLS was increased in an independent cohort  
227 of neo-antigen-low, -intermediate and -high endometrial cancers. Our findings shed new light on the  
228 link between innate and adaptive immunity in general and on the link between CD8+ CTL activation  
229 and the induction of TLS in particular. Our data identify CD103 and TLS as potential biomarkers of  
230 interest for cancer immunotherapy.

231 The expression of CXCL13 in CD103+ CTLs was remarkable, since CXCL13 is reported to be  
232 produced by DCs, T<sub>FH</sub> and B cells only<sup>32,33,37,38</sup>. We have therefore carefully assessed previously  
233 published (single cell) sequencing data of exhausted, tumor-infiltrating T cells of liver cancer, lung  
234 cancer and melanoma<sup>9,39,40</sup>. These published data support our finding that exhausted CD8+ TIL can  
235 express CXCL13 on the mRNA level, even though this finding was not mentioned in either of the  
236 papers. Moreover, the finding that TGF- $\beta$ 1, a cytokine mostly associated with immune  
237 suppression<sup>32,41-45</sup>, was essential for the induction of CXCL13 is intriguing. Under homeostatic  
238 conditions, TGF- $\beta$ 1 is abundantly present in epithelial tissue and controls the epithelial localization of  
239 resident memory immune subsets such as the intraepithelial lymphocytes in the colon<sup>46</sup>. In epithelial  
240 cancers, we suggest that TGF- $\beta$ 1 has a similar role in promoting not only recruitment, signaling and  
241 retention of CD8+ CTLs via CD103 expression<sup>35</sup>, but also stimulating immunity via attraction of C-X-C  
242 chemokine receptor type 5 (CXCR5)+ immune cells through CXCL13 signaling.

243 CXCL13 is the key molecular determinant of TLS formation<sup>22-24</sup>, ectopic lymphoid structures  
244 that are thought to enable efficient local priming of T cells by dendritic cells (DCs)<sup>11,12</sup>. Hereby, the  
245 time-consuming migration of DCs and T cells to and from secondary lymph nodes may be  
246 circumvented, augmenting local anti-tumor immunity. In line with this, characteristic components of  
247 TLS such as high endothelial venules (HEVs) and B cells, were found to be generally associated with

248 an improved prognosis<sup>13</sup>. In addition, plasma B cells in the TLS are thought to enhance the antitumor  
249 response by production and subsequent accumulation of anti-tumor antibodies, potentially leading to  
250 antibody-dependent cytotoxicity and opsonization<sup>16</sup>. Thus, TLS may orchestrate a joint T and B cells  
251 response to improve anti-tumor immunity.

252 As TLS were found to be more abundant in tumors with a high mutational load, we postulated  
253 that activated CD103+ CTLs are involved in the formation of TLS in cancer via production of CXCL13.  
254 This is supported by the observations that highly mutated, CD8+ T cell-rich tumors showed higher  
255 expression of *CXCL13* and *ITGAE* (CD103) and that they presented with significantly higher numbers  
256 of TLS. In accordance, a higher degree of T cell receptor clonality within CD8+ T cells correlated with  
257 a higher number of TLS in non-small cell lung cancer<sup>47</sup>. These TLS may represent an ongoing  
258 immune response that was insufficient to halt tumor progression at an early time point. It would  
259 therefore be of great interest to study the induction and formation of TLS in developing cancer lesions  
260 and to determine whether CD8 infiltration precedes TLS formation.

261 In line with previous work<sup>28,29</sup>, CD103+ CTLs from human tumors were also characterized by  
262 a marked activation and exhaustion-related gene expression signature with differential expression of  
263 granzymes and well-known immune checkpoint molecules, such as cytotoxic T-lymphocyte-  
264 associated protein 4 (*CTLA4*). In addition, CD103+ CTLs expressed a host of additional immune  
265 checkpoint genes currently under clinical investigation, such as T cell immunoglobulin and mucin-  
266 domain containing-3 (*TIM3*), lymphocyte-activation protein 3 (*LAG3*) and T-cell immunoglobulin and  
267 ITIM domain (*TIGIT*). As such, our findings also have implications for clinical immunotherapy.

268 Indeed, tissue-resident CD103+ CTLs were recently found to be significantly expanded upon  
269 treatment with Nivolumab and Pembrolizumab (anti-PD-1) in tumor specimens of advanced stage  
270 metastatic melanoma patients<sup>48</sup>. Accordingly, a paper by Riaz et al. demonstrated that tumors from  
271 patients who responded to Nivolumab treatment differentially expressed genes such as *CTLA4*, *TIM3*,  
272 *LAG3*, *PDCD1*, Granzyme B (*GZMB*), tumor necrosis factor receptor superfamily member 9  
273 (*TNFRSF9*) and *CXCL13*, all genes overexpressed in CD103+ vs. CD103- CTLs<sup>9</sup>. Notably, pre-  
274 treatment, but not on-treatment *CXCL13* was differentially expressed in responders vs. non-  
275 responders in this study<sup>9</sup>. This may be explained by the low basal CXCL13 secretion we observed in  
276 the exhausted, CD103+ CTLs freshly isolated from untreated human tumors. In their exhausted state,  
277 CTLs might accumulate mRNA encoding several key effector molecules, that is translated only upon



278 reactivation by e.g. immune checkpoint blockade (ICB). In line with this, Riaz et al. observed a  
279 marked increase in the number of B cell-related genes on treatment in responding patients<sup>9</sup>, perhaps  
280 hinting at the formation of TLS in these patients upon ICB-mediated release of CXCL13. This  
281 hypothesis is supported by the recently published increase in serum CXCL13 levels and concomitant  
282 depletion of CXCR5+ B cells from the circulation in patients treated with anti-CTLA-4 and/or anti-PD-1  
283 antibodies<sup>49</sup>. Our data therefore suggest that ICB is of particular interest for patients with a high  
284 CD103+ CXCL13+ CTL infiltration pre-treatment across malignancies.

285         Several novel combination immunotherapy regimes that promote CTL infiltration and TLS  
286 formation may also function via CTL-dependent production of CXCL13. For instance, combined  
287 therapy with anti-angiogenic and immunotherapeutic agents in mice stimulated the transformation of  
288 tumor blood vessels into intratumoral HEVs, which subsequently enhanced the infiltration and  
289 activation of CTLs and the destruction of tumor cells<sup>50,51</sup>. These CTLs formed structures around the  
290 HEVs that closely resembled TLS<sup>50,51</sup>. One of these studies found that induction of TLS was  
291 dependent on both CD8+ T cells and macrophages<sup>50</sup>. However, the exact intratumoral mechanism of  
292 action remained unclarified. Since macrophages produce TGF- $\beta$  in a chronically inflamed  
293 environment<sup>32</sup>, we hypothesize that the macrophages in these studies may have generated a TGF- $\beta$   
294 enriched environment, thus leading to the production of CXCL13 chemokine by activated T cells and  
295 subsequently to the formation of lymphoid structures. TLS may therefore reflect an ongoing CD8+ T  
296 cell response in cancer. As such, TLS may be used as a biomarker to predict response to immune  
297 checkpoint blockade. In addition, these structures may be used as a general biomarker for response  
298 to immunotherapy, since TLS were found to mark pancreatic cancer patients who responded to  
299 therapeutic vaccination<sup>52</sup>.

300         Taken together, we demonstrate that TGF- $\beta$ 1 induces co-expression of CXCL13 and CD103  
301 in CD8+ T cells, linking CD8+ T cell activation to TLS formation. Our findings therefore provide a new  
302 perspective on how (neo-)antigens can promote the formation of TLS in human tumors. Accordingly,  
303 TLS and/or CD103+ cells should be considered as a potential novel predictive or response biomarker  
304 for immune checkpoint blockade therapy.

## 305 **Materials and Methods**

### 306 *Patients*

307 Tumor tissue from four patients with stage IIIC high-grade serous ovarian cancer was collected during  
308 primary cytoreductive surgery, prior to chemotherapy, and from one patient with stage IV high-grade  
309 serous ovarian cancer during interval debulking upon three cycles of chemotherapy. Selection of  
310 uterine cancer (UC) patients was described previously<sup>53</sup>. Briefly, UC tissue was obtained from  
311 patients involved in the PORTEC-1 and PORTEC-2 studies (n=57) and the UC series (n=67) from  
312 Leiden University Medical Center (LUMC) and UC series (n=26) from the University Medical Center  
313 Groningen<sup>26</sup>. Tumor material from 119 patients was available for analysis. Mutations in the  
314 exonuclease domain of polymerase epsilon (*POLE*-EDM) and microsatellite instability status were  
315 known from previous studies (Van Gool, Church). Of the tumors available for this study, 42 tumors  
316 were *POLE* wild-type, microsatellite stable (MSS), 38 were *POLE* wild-type, microsatellite unstable  
317 (MSI) and 39 were *POLE*-EDM. *POLE*-EDM statuses did not co-occur with microsatellite instability. All  
318 cases were of endometrioid histology (EEC) and the number of low grade and high-grade tumors was  
319 spread equally over the three molecular groups. Ethical approval for tumor molecular analysis was  
320 granted at LUMC, UMCG and by Oxfordshire Research Ethics Committee B (Approval No.  
321 05\Q1605\66).

### 322 *Analysis of TCGA mRNA sequencing data*

323 RSEM normalized mRNAseq data and clinical data from uterine corpus endometrial carcinoma  
324 (UCEC), ovarian cancer (OV), breast cancer (BRCA) and lung adenocarcinoma (LUAD) were  
325 downloaded from firebrowse.org on 13-03-2017 (UCEC) and 14-07-2017(OV, BRCA, LUAD). RSEM  
326 mRNA sequencing expression data were log<sub>2</sub> +1 transformed and genes with zero reads in all  
327 samples were removed. *POLE*-EDM, MSI and MSS cases were identified in the endometrial cancer  
328 data; mononucleotide and dinucleotide marker panel analysis status was provided by The Cancer  
329 Genome Atlas (TCGA) and mutations in the exonuclease domain of *POLE* were determined  
330 previously<sup>54</sup>. Heatmaps were constructed in R (version 3.3.1) with packages gplots and ggplots. The  
331 javaGSEA Desktop Application was downloaded from  
332 <http://software.broadinstitute.org/gsea/index.jsp>. TCGA uterine corpus endometrial cancer and  
333 ovarian cancer log<sub>2</sub>+1 transformed data and phenotype data were converted to a suitable format and

334 entered in the GSEA desktop application. Several gene-sets were used to determine enrichment for  
335 cytotoxic T lymphocytes (CTLs), CD8+ T cells, CD4 helper cells or tertiary lymphoid  
336 structures(TLS)<sup>13,55</sup>, as well as the CD8+CD103+ signatures derived from the sequencing data. Gene-  
337 set enrichment for TLS genes was determined for *POLE*-EDM versus MSS in uterine corpus  
338 endometrial cancer and gene-set enrichments for CTLs, CD8, CD4, TFH and CD8+CD103+ genes  
339 were determined for CXCL13hi versus CXCL13lo (based on median gene expression) tumors in all  
340 cancers analyzed.

341 Spearman correlations between the TLS signature, the CD8+CD103+ signature and the CD8+CD103-  
342 signature were visualized in correlation plots using the Corrplot package (Version 0.77) in R.  
343 Differences in survival were evaluated with a logrank test within the Survival package (Version 2.41-3)  
344 in R. All analyses were performed in R (version 3.4.0), with exception of the construction of the  
345 heatmap in Figure 1, which was made in R version 3.3.1.

#### 346 *Immunohistochemistry*

347 Formalin-fixed, paraffin-embedded (FFPE) slides were de-paraffinized and rehydrated in graded  
348 ethanol. Antigen retrieval was initiated with a preheated 10mM citrate buffer (pH6) and endogenous  
349 peroxidase activity was blocked by submerging sections in a 0.45% Hydrogen peroxide solution.  
350 Slides were incubated overnight with 0.63 mg/L of anti-CD20 antibody (Dako, Glostrup, Denmark) at  
351 4°C. Subsequently, slides were incubated with a peroxidase-labeled polymer for 30 minutes  
352 (Envision+ anti-mouse Dako, Carpinteria, USA). Signal was visualized with 3,3'diaminobenzidin  
353 (DAB) solution and slides were counterstained with haematoxylin. Appropriate washing steps with  
354 PBS were performed in-between incubation steps. Sections were embedded in Eukitt mounting  
355 medium (Sigma Aldrich, Steinheim, Germany) and slides were scanned on a Hamamatsu digital slide  
356 scanner (Hamamatsu photonics, Hamamatsu, Japan). The number of CD20+ (dense) follicles in each  
357 slide was quantified in NDPview2 software by two independent observers who were blinded to  
358 clinicopathological data. Immunohistochemistry for CD8 was performed previously in this cohort<sup>26</sup>.

#### 359 *Multi-color immunofluorescence*

360 FFPE slide preparation and antigen retrieval were performed as described above. Next, slides were  
361 incubated overnight at 4°C with primary antibody and subsequently incubated with the appropriate

362 secondary antibody for 45 minutes at room temperature. Specific signal was amplified using the TSA  
363 Cyanine 5 (Cy5) detection kit (Perkin Elmer, NEL705A001KT, Boston, USA) or the TSA Cyanine 3  
364 (Cy3) and Fluorescein detection kit (Perkin Elmer, 753001KT, Waltham, USA), according to  
365 manufacturer's protocols. To allow multiple amplifications on the same slide, primary HRP labels were  
366 destroyed between incubations by washing with 0.01 M hydrochloric acid for 10 minutes. Appropriate  
367 washing steps with PBS-0,05%Tween20 were performed during the procedure. Finally, slides were  
368 embedded in Prolong Diamond anti-fade mounting medium with or without DAPI (Invitrogen/Thermo  
369 Fisher Scientific, P36962 and P36961, Oregon, USA) and scanned using the TissueFAXS  
370 microscope (TissueGnostics, Vienna, Austria). Overlay images were produced using Adobe  
371 Photoshop software.

### 372 *mRNA sequencing*

373 Ovarian tumors from two patients were cut into pieces of <1 mm<sup>3</sup> and put in a culture flask with  
374 digestion medium, consisting of RPMI (Gibco, Paisley, UK), 10% Fetal Bovine Serum (FBS, Gibco,  
375 Paisley, UK), 1 mg/ml collagenase type IV (Gibco, Grand Island, USA) and 12.6 mL/L Pulmozyme  
376 (Roche, Woerden, the Netherlands) for overnight digestion at room temperature. After digestion, the  
377 suspension was washed with PBS and strained through a 70 µm filter. Cells were centrifuged over a  
378 Ficoll-Paque gradient (GE Healthcare Bio-Sciences AB, Uppsala, Sweden), suspended in FBS with  
379 10% dimethylsulfoxide and stored in liquid nitrogen until further use. Prior to sequencing, tumor  
380 digests were thawed on ice, washed with AIM-V medium (Gibco, Paisley, UK) with 5% pooled human  
381 serum (PHS, One Lambda, USA) and centrifuged at 1000g. Pellets were resuspended in AIM-V with  
382 5% PHS and cells were incubated with CD3-BV421, CD4-PerCP-Cy5.5, CD8α-APCeFluor780, CD8β-  
383 PEcy7 TCRαβ-APC, CD103-FITC and CD56-PE antibodies at 4°C for 45 minutes. After gating for  
384 CD3+CD4-CD8αβ+TCRαβ+CD56- cells, CD103- and CD103+ single cells were sorted on a Beckman  
385 Coulter Astrios directly into lysis buffer (0.2 % Triton X-100 and Recombinant RNase inhibitor  
386 (Westburg-Clontech) in 96-well PCR plates. Each well contained a unique indexed Oligo dT primer,  
387 enabling identification of individual cells after pooled RNA sequencing. In addition to single cells wells,  
388 small bulk population of 20 cells were sorted per microplate well. Per patient, 40 single CD8<sup>+</sup> T cells  
389 (20 wells CD103<sup>+</sup>, 20 wells CD103<sup>-</sup>) and 20 small bulk 20-cell populations (10 wells CD103<sup>+</sup>, 10 wells  
390 CD103<sup>-</sup>) were sorted. After lysis of the cells, the transcriptomes were amplified by a modified SMART-

391 Seq2 protocol using SmartScribe reverse transcriptase (Westburg-Clontech, CL639537), based on a  
392 previously published protocol (Picelli et al.<sup>REF</sup>). Sequencing libraries were prepared using the Illumina  
393 Nextera XT DNA sample preparation kit. Presence and size distribution of the obtained PCR product  
394 were checked on a PerkinElmer LabChip GX high-sensitivity DNA chip. A super pool was created by  
395 equimolar pooling of the Nextera products and the samples were sequenced on Illumina NextSeq500  
396 2500 using 50bp paired-end reads, one read for the mRNA transcript and the other for the cell-  
397 barcode. The obtained RNA sequencing data were demultiplexed into individual FASTQ files. The  
398 obtained single-end reads were aligned to human reference genome 37 (GRCh37, top-level built),  
399 using STAR (version 2.5.2). We then used RNA-SeQC (version 1.1.8 ) to assess the quality of each  
400 sample and all cells that did not meet one of the following criteria were removed: <10000 transcripts  
401 detected, <500000 uniquely mapped reads, <1000 genes detected, a mapping rate of <0.5, an  
402 expression profiling efficiency of <0.4 or an exonic rate of <0.5. Differential expression was analyzed  
403 to obtain insight into the differences between CD103<sup>+</sup> and CD103<sup>-</sup> CD8<sup>+</sup> T cells from the 20-cell  
404 populations with DESeq2 (version 1.16.1). For this analysis, expression values for each sample have  
405 been obtained using RSEM (version 1.3.0, with Bowtie 2 , version 2.2.5, non-stranded and with the  
406 single-cell prior activated to account for drop-out genes in both, bulk and single cells) and have been  
407 computed for the Gencode 19 transcriptome annotation for GRCh37 (reference index built with –  
408 polyA activated).

409 Genes with a Benjamini-Hochberg adjusted p-value of <0.05 were selected for further analysis.

410 Differentially expressed genes were visualized in a Volcano plot (DESeq2, version 1.16.1).

#### 411 *ELISA*

412 Tumor-infiltrating lymphocytes from three high-grade serous ovarian cancer digests were stained and  
413 sorted as described for mRNA sequencing. The numbers of sorted T cells for the three patients were  
414  $163 \times 10^3$ ,  $216 \times 10^3$  and  $154 \times 10^3$  for CD4<sup>+</sup> cells,  $82 \times 10^3$ ,  $38 \times 10^3$  and  $83 \times 10^3$  for CD8<sup>+</sup>CD103<sup>-</sup> and  
415  $207 \times 10^3$ ,  $120 \times 10^3$  and  $146 \times 10^3$  for CD8<sup>+</sup>CD103<sup>+</sup> T cells. Sorted T cells remained unstimulated or  
416 were activated, either with phorbol myristate acetate (PMA) and ionomycin (500x dilution, Invitrogen,  
417 00-4970-93 Carlsbad USA) or with Dynabeads® (2 $\mu$ L/1x10<sup>5</sup> cells, T-activator CD3/CD28 beads,  
418 11131D, Gibco, Oslo, Norway and Vilnius, Lithuania). In addition, peripheral blood CD8<sup>+</sup> T cells were  
419 isolated from blood of four healthy volunteers by a Ficoll-Paque gradient followed by magnetic

420 activated cell sorting with a CD8 T cell negative selection kit (Affymetrix, San Diego, USA). Peripheral  
421 blood CD8<sup>+</sup> T cells were incubated in AIM-V medium, with or without Dynabeads® (2µL/1x10<sup>5</sup> cells)  
422 for activation, recombinant TGF-β1 (rTGF- β1, 100 ng/mL, Peprotech, USA), TGF-β1 receptor  
423 inhibitor (10µM, SB431542, Sigma Aldrich/Merck, Saint Louis, USA) or a combination of these.  
424 Similar experiments were performed with the addition of IL2 (100 IU/mL, Novartis Pharmaceuticals,  
425 UK). For the dose-response curve, peripheral blood CD8<sup>+</sup> T cells from three healthy donors were  
426 incubated with or without Dynabeads® (2µL/1x10<sup>5</sup> cells) for activation and with recombinant TGF-β1  
427 at doses ranging from 0 to 100 ng/mL (rTGF- β1, Peprotech, USA). All cells were cultured in AIM-V  
428 medium with 5% pooled human serum in 96-well plates containing 1x10<sup>5</sup> cells per condition. After 7  
429 days, plates were centrifuged and supernatant was collected for ELISA. CXCL13 sandwich ELISA  
430 experiments were performed according to manufacturer's protocol (Human CXCL13/BLC/BCA-1  
431 DuoSet ELISA DY801, R&D Abingdon, UK or, for the dose-response curve, Minneapolis, USA). In  
432 brief, plates were coated with a capture antibody, followed by incubation with cell supernatant.  
433 Binding of CXCL13 was detected using secondary antibody, streptavidin-HRP and TMB 1-Component  
434 Microwell Peroxidase Substrate (SureBlue, KPL/SeraCare, Milford, USA) Substrate conversion was  
435 stopped after 20 minutes with 0.01M Hydrogen Chloride. Plates were washed with PBS-  
436 0.05%Tween20 in-between incubations. OD values were obtained using a micro plate reader set to  
437 450 nm (BioRad iMark™ Microplate reader). AIM-V medium was used as a negative control.

#### 438 *Chemokine arrays*

439 CD8<sup>+</sup> T cells were isolated from from blood of three healthy donors as described for ELISA. Per  
440 condition, 5x10<sup>5</sup> cells were cultured in AIM-V medium with 5% PHS in a 24-well plate. Cells were  
441 either incubated for 7 days in medium alone, with rTGF-β1 (100 ng/mL, Peprotech, USA), with  
442 Dynabeads® (2µL/1x10<sup>5</sup> cells, T-activator CD3/CD28 beads, 11131D, Gibco, Oslo, Norway and  
443 Vilnius, Lithuania) or with both rTGF-β1 and Dynabeads®. Samples were centrifuged and  
444 supernatants were collected to analyze production of chemokines on chemokine arrays, according to  
445 manufacturer's instructions (31 chemokines using the Proteome Profiler Human Chemokine Array Kit,  
446 ARY017, R&D, Abingdon, UK, and 38 chemokines using the Human Chemokine Antibody Array -  
447 Membrane, ab169812, Abcam, Huissen, the Netherlands). In brief, chemokine receptor-coated  
448 membranes were incubated with supernatant over night at 4°C. Next, captured proteins were

449 visualized using chemiluminescent detection reagents. Appropriate washing steps were performed in-  
450 between incubation steps. Membranes were imaged on BioRad ChemiDoc™ MP Imaging System,  
451 densitometric analysis of chemokine spots was performed using the Protein Array Analyzer plugin for  
452 Image J<sup>56</sup>.

#### 453 *Statistical analyses*

454 Differentially expressed genes in CD103+CD8+ versus CD103-CD8+ T cells sorted from human  
455 ovarian tumors were determined by DESeq2 for 20 cells-populations. Genes with a Benjamini  
456 Hochberg adjusted p-value of <0.05 were selected for further analysis. Differences in FPKM-values of  
457 single-cells were assessed by a Mann-Whitney U test. Differences in number of TLS on FFPE slides  
458 of molecular subgroups of EC were determined by a non-parametric Kruskal-Wallis test, followed by  
459 Dunn's post-hoc analysis. We analyzed TCGA mRNA sequencing data and compared differences in  
460 gene expression between molecular subgroups of EC with a non-parametric Kruskal-Wallis test and a  
461 post-hoc Dunn's test. CXCL13 production was analyzed using a Kruskal-Wallis comparison with a  
462 post-hoc Dunn's test, or, for the dose-response curve, with a two-way ANOVA followed by a post-hoc  
463 Bonferroni test. The chemokine arrays were analyzed using a Kruskal-Wallis test with a post-hoc  
464 Dunn's test. All statistical analyses were performed using R version 3.4.0 or GraphPad Prism  
465 (GraphPad Software Inc., CA, USA).

466 **Acknowledgements**

467 The authors would like to thank Henk Moes, Geert Mesander, Johan Teunis, Joan Vos and Niels  
468 Koupprie for their technical assistance. This work was supported by Dutch Cancer Society/Alpe  
469 d'Huzes grant UMCG 2014–6719 to MB, Dutch Cancer Society Young Investigator Grant 10418 to  
470 TB, Jan Kornelis de Cock Stichting grants to FLK, KLB, FAE and HHW, Nijbakker-Morra Stichting and  
471 Studiefonds Ketel1 grants to HHW, the Oxford NIHR Comprehensive Biomedical Research Centre,  
472 core funding to the Wellcome Trust Centre for Human Genetics from the Wellcome Trust  
473 (090532/Z/09/Z), a Wellcome Trust Clinical Training Fellowship to MG and a Health  
474 Foundation/Academy of Medical Sciences Clinician Scientist Fellowship award to DNC. The views  
475 expressed are those of the authors and not necessarily those of the NHS, the NIHR, the Department  
476 of Health or the Wellcome Trust.



477 **Author Contributions**

478 HHW, RA and MG performed TCGA and RNAseq analyses; JML and TP performed the IHC and IF  
479 staining; PV and KL performed the RNAseq experiments; TB, CLC, and IG collected, processed and  
480 selected the tumor tissue for IHC and IF; FAE, MCAW, FLK and EP collected and processed tumor  
481 tissue for RNAseq and ex vivo studies; HHW, JML and AK performed the in vitro and ex vivo  
482 analyses; DNC, HWN, and MB supervised the study; HHW, JML, HWN and MB conceived and  
483 designed the study and wrote the paper.

484 **Disclosure of Competing Interests**

485 The authors have no conflicts of interest to disclose.

486 **References**

- 487 1. Ansell, S. M. *et al.* PD-1 Blockade with Nivolumab in Relapsed or Refractory Hodgkin's  
488 Lymphoma. *N. Engl. J. Med.* **372**, 311–319 (2015).
- 489 2. Apolo, A. B. *et al.* Avelumab , an Anti – Programmed Death-Ligand 1 Antibody , In Patients  
490 With Refractory Metastatic Urothelial Carcinoma : Results From a Multicenter , Phase Ib  
491 Study. *J Clin Oncol.* **35**, (2017).
- 492 3. Hamid, O. *et al.* Safety and Tumor Responses with Lambrolizumab (Anti–PD-1) in Melanoma.  
493 *N. Engl. J. Med.* **369**, 134–144 (2013).
- 494 4. Powles, T. *et al.* MPDL3280A (anti-PD-L1) treatment leads to clinical activity in metastatic  
495 bladder cancer. *Nature* **515**, 558–562 (2014).
- 496 5. Borghaei, H. *et al.* Nivolumab versus Docetaxel in Advanced Nonsquamous Non–Small-Cell  
497 Lung Cancer. *N. Engl. J. Med.* **373**, 1627–1639 (2015).
- 498 6. Pardoll, D. M. The blockade of immune checkpoints in cancer immunotherapy. *Nat. Rev.*  
499 *Cancer* **12**, 252–264 (2012).
- 500 7. Snyder, A. *et al.* Genetic Basis for Clinical Response to CTLA-4 Blockade in Melanoma. *N.*  
501 *Engl. J. Med.* **371**, 2189–2199 (2014).
- 502 8. Rizvi, N. A. *et al.* Mutational landscape determines sensitivity to PD-1 blockade in non – small  
503 cell lung cancer. **348**, 124–129 (2016).
- 504 9. Riaz, N. *et al.* Tumor and Microenvironment Evolution during Immunotherapy with Nivolumab.  
505 *Cell* **171**, 934–949.e15 (2017).
- 506 10. Dieu-Nosjean, M. C., Goc, J., Giraldo, N. A., Sautès-Fridman, C. & Fridman, W. H. Tertiary  
507 lymphoid structures in cancer and beyond. *Trends Immunol.* **35**, 571–580 (2014).
- 508 11. Buisseret, L. *et al.* Tumor-infiltrating lymphocyte composition, organization and PD-1/ PD-L1  
509 expression are linked in breast cancer. *Oncoimmunology* **6**, e1257452 (2017).
- 510 12. Dieu-Nosjean, M. C. *et al.* Tertiary lymphoid structures, drivers of the anti-tumor responses in  
511 human cancers. *Immunol. Rev.* **271**, 260–275 (2016).
- 512 13. Sautès-Fridman, C. *et al.* Tertiary lymphoid structures in cancers: Prognostic value, regulation,  
513 and manipulation for therapeutic intervention. *Front. Immunol.* **7**, 1–11 (2016).
- 514 14. Becht, E., Giraldo, N. A., Dieu-Nosjean, M. C., Sautès-Fridman, C. & Fridman, W. H. Cancer  
515 immune contexture and immunotherapy. *Curr. Opin. Immunol.* **39**, 7–13 (2016).

- 516 15. Giraldo, N. A. *et al.* Orchestration and prognostic significance of immune checkpoints in the  
517 microenvironment of primary and metastatic renal cell cancer. *Clin. Cancer Res.* **21**, 3031–  
518 3040 (2015).
- 519 16. Kroeger, D. R., Milne, K. & Nelson, B. H. Tumor-infiltrating plasma cells are associated with  
520 tertiary lymphoid structures, cytolytic T-cell responses, and superior prognosis in ovarian  
521 cancer. *Clin. Cancer Res.* **22**, 3005–3015 (2016).
- 522 17. Pimenta, E. M. & Barnes, B. J. Role of tertiary lymphoid structures (TLS) in anti-tumor  
523 immunity: Potential tumor-induced cytokines/chemokines that regulate TLS formation in  
524 epithelial-derived cancers. *Cancers (Basel)*. **6**, 969–997 (2014).
- 525 18. Alsughayyir, J., Pettigrew, G. J. & Motallebzadeh, R. Spoiling for a fight: B lymphocytes as  
526 initiator and effector populations within tertiary lymphoid organs in autoimmunity and  
527 transplantation. *Front. Immunol.* **8**, (2017).
- 528 19. Ansel, K. M., Harris, R. B. S. & Cyster, J. G. CXCL13 is required for B1 cell homing, natural  
529 antibody production, and body cavity immunity. *Immunity* **16**, 67–76 (2002).
- 530 20. Van De Pavert, S. A. *et al.* Chemokine cxcl13 is essential for lymph node initiation and is  
531 induced by retinoic acid and neuronal stimulation. *Nat. Immunol.* **10**, 1193–1199 (2009).
- 532 21. Ansel, K. M. *et al.* A chemokine-driven positive feedback loop organizes lymphoid follicles.  
533 *Nature* **406**, 309–314 (2000).
- 534 22. Luther, S. A., Ansel, K. M. & Cyster, J. G. Overlapping Roles of CXCL13, Interleukin 7  
535 Receptor  $\alpha$ , and CCR7 Ligands in Lymph Node Development. *J. Exp. Med.* **197**, 1191–1198  
536 (2003).
- 537 23. Luther, S. A., Lopez, T., Bai, W., Hanahan, D. & Cyster, J. G. BLC expression in pancreatic  
538 islets causes B cell recruitment and lymphotoxin-dependent lymphoid neogenesis. *Immunity*  
539 **12**, 471–481 (2000).
- 540 24. Gräbner, R. *et al.* Lymphotoxin  $\beta$  receptor signaling promotes tertiary lymphoid organogenesis  
541 in the aorta adventitia of aged *ApoE*<sup>-/-</sup> mice. *J. Exp. Med.* **206**, 233–248 (2009).
- 542 25. Posch, F. *et al.* Maturation of tertiary lymphoid structures and recurrence of stage II and III  
543 colorectal cancer. *Oncoimmunology* **7**, 1–13 (2018).
- 544 26. Van Gool, I. C. *et al.* POLE proofreading mutations elicit an antitumor immune response in  
545 endometrial cancer. *Clin. Cancer Res.* **21**, 3347–3355 (2015).

- 546 27. Bobisse, S. *et al.* Sensitive and frequent identification of high avidity neo-epitope specific  
547 CD8+ T cells in immunotherapy-naive ovarian cancer. *Nat. Commun.* **9**, 1092 (2018).
- 548 28. Workel, H. H. *et al.* CD103 defines intraepithelial CD8+ PD1+ tumour-infiltrating lymphocytes  
549 of prognostic significance in endometrial adenocarcinoma. *Eur. J. Cancer* **60**, 1–11 (2016).
- 550 29. Komdeur, F. L. *et al.* CD103 + intraepithelial T cells in high-grade serous ovarian cancer are  
551 phenotypically diverse TCR $\alpha\beta$  + CD8 $\alpha\beta$  + T cells that can be targeted for cancer  
552 immunotherapy. **7**, (2016).
- 553 30. Komdeur, F. L. *et al.* CD103+ tumor-infiltrating lymphocytes are tumor-reactive intraepithelial  
554 CD8+ T cells associated with prognostic benefit and therapy response in cervical cancer.  
555 *Oncoimmunology* **6**, 1–14 (2017).
- 556 31. Djenidi, F. *et al.* CD8<sup>+</sup> CD103<sup>+</sup> Tumor-Infiltrating Lymphocytes Are Tumor-Specific Tissue-  
557 Resident Memory T Cells and a Prognostic Factor for Survival in Lung Cancer Patients. *J.*  
558 *Immunol.* **194**, 3475–3486 (2015).
- 559 32. Kobayashi, S. *et al.* TGF- $\beta$  induces the differentiation of human CXCL13-producing CD4+ T  
560 cells. *Eur. J. Immunol.* **46**, 360–371 (2016).
- 561 33. Rasheed, A.-U., Rahn, H.-P., Sallusto, F., Lipp, M. & Müller, G. Follicular B helper T cell  
562 activity is confined to CXCR5hiICOShi CD4 T cells and is independent of CD57 expression.  
563 *Eur. J. Immunol.* **36**, 1892–1903 (2006).
- 564 34. Mokrani, M., Klibi, J., Bluteau, D., Bismuth, G. & Mami-Chouaib, F. Smad and NFAT Pathways  
565 Cooperate To Induce CD103 Expression in Human CD8 T Lymphocytes. *J. Immunol.* **192**,  
566 2471–2479 (2014).
- 567 35. Boutet, M. *et al.* TGF $\beta$  signaling intersects with CD103 integrin signaling to promote T-  
568 Lymphocyte accumulation and antitumor activity in the lung tumor microenvironment. *Cancer*  
569 *Res.* **76**, 1757–1769 (2016).
- 570 36. Park, B. V. *et al.* TGF $\beta$ 1-mediated SMAD3 enhances PD-1 expression on antigen-specific T  
571 cells in cancer. *Cancer Discov.* **6**, 1366–1381 (2016).
- 572 37. Vissers, J. L. M., Hartgers, F. C., Lindhout, E., Figdor, C. G. & Adema, G. J. BLC (CXCL13) is  
573 expressed by different dendritic cell subsets in vitro and in vivo. *Eur. J. Immunol.* **31**, 1544–  
574 1549 (2001).
- 575 38. Litsiou, E. *et al.* CXCL13 production in B cells via toll-like receptor/lymphotoxin receptor

- 576 signaling is involved in lymphoid neogenesis in chronic obstructive pulmonary disease. *Am. J.*  
577 *Respir. Crit. Care Med.* **187**, 1194–1202 (2013).
- 578 39. Zheng, C. *et al.* Landscape of Infiltrating T Cells in Liver Cancer Revealed by Single-Cell  
579 Sequencing. *Cell* **169**, 1342–1356.e16 (2017).
- 580 40. Ganesan, A.-P. *et al.* Tissue-resident memory features are linked to the magnitude of cytotoxic  
581 T cell responses in human lung cancer. *Nat. Immunol.* **18**, 940–950 (2017).
- 582 41. Yoshimura, A. & Muto, G. TGF- $\beta$  Function in Immune Suppression. *Curr. Top. Microbiol.*  
583 *Immunol.* **350**, (2010).
- 584 42. Wrzesinski, S. H., Wan, Y. Y. & Flavell, R. A. Transforming growth factor- $\beta$  and the immune  
585 response: Implications for anticancer therapy. *Clin. Cancer Res.* **13**, 5262–5270 (2007).
- 586 43. Blobel, G., Schiemann, W. P. & Lodish, H. F. Role of transforming growth factor beta in human  
587 disease. *N. Engl. J. Med.* **342**, 1350–1358 (2000).
- 588 44. Johnston, C. J. C., Smyth, D. J., Dresser, D. W. & Maizels, R. M. TGF- $\beta$  in tolerance,  
589 development and regulation of immunity. *Cell. Immunol.* **299**, 14–22 (2015).
- 590 45. Massagué, J., Blain, S. W. & Lo, R. S. TGF $\beta$  Signaling in Growth Control, Cancer, and  
591 Heritable Disorders. *Cell* **103**, 295–309 (2000).
- 592 46. Konkel, J. E. *et al.* Control of the development of CD8 $\alpha\alpha$ + intestinal intraepithelial lymphocytes  
593 by TGF- $\beta$ . *Nat. Immunol.* **12**, 312–320 (2011).
- 594 47. Zhu, W. *et al.* A high density of tertiary lymphoid structure B cells in lung tumors is associated  
595 with increased CD4<sup>+</sup> T cell receptor repertoire clonality. *Oncoimmunology* **4**, e1051922  
596 (2015).
- 597 48. Edwards, J. *et al.* CD103+ tumor-resident CD8+ T cells are associated with improved survival  
598 in immunotherapy naive melanoma patients and expand significantly during anti-PD-1  
599 treatment. *Clin. Cancer Res.* (2018). doi:10.1158/1078-0432.CCR-17-2257
- 600 49. Das, R. *et al.* Early B cell changes predict autoimmunity following combination immune  
601 checkpoint blockade. *J. Clin. Invest.* **128**, 2–7 (2018).
- 602 50. Johansson-Percival, A. *et al.* De novo induction of intratumoral lymphoid structures and vessel  
603 normalization enhances immunotherapy in resistant tumors. *Nat. Immunol.* **18**, 1207–1217  
604 (2017).
- 605 51. Allen, E. *et al.* Combined antiangiogenic and anti-PD-L1 therapy stimulates tumor immunity

- 606 through HEV formation. *Sci. Transl. Med.* **9**, eaak9679 (2017).
- 607 52. Lutz, E. R. *et al.* Immunotherapy Converts Nonimmunogenic Pancreatic Tumors into  
608 Immunogenic Foci of Immune Regulation. *Cancer Immunol. Res.* **2**, 616–631 (2014).
- 609 53. Eggink, F. A. *et al.* Immunological profiling of molecularly classified high-risk endometrial  
610 cancers identifies POLE-mutant and microsatellite unstable carcinomas as candidates for  
611 checkpoint inhibition. *Oncoimmunology* **6**, (2017).
- 612 54. Rayner, E. *et al.* A panoply of errors: polymerase proofreading domain mutations in cancer.  
613 *Nat. Rev. Cancer* **16**, 71–81 (2016).
- 614 55. Bindea, G. *et al.* Spatiotemporal dynamics of intratumoral immune cells reveal the immune  
615 landscape in human cancer. *Immunity* **39**, 782–795 (2013).
- 616 56. Gilles Carpentier and Emilie Henault, Protein Array Analyzer for ImageJ. Proceedings of the  
617 ImageJ User and Developer Conference, Centre de Recherche Public Henri Tudor, ed., (ISBN  
618 2-919941- 11-9), pp. 238-240, 2010.
- 619

620 **Figure legends**

621 **Figure 1. Tertiary lymphoid structures are associated with mutational load in human tumors. A)**

622 Heatmap of relative gene expression of tertiary lymphoid structures-associated genes, cytotoxic T  
623 cell-, CD8+ T cell- and CD4+ follicular helper T cell-related genes in TCGA data of ovarian, uterine,  
624 lung and breast cancer. Tumors are ranked from lowest to highest number of mutations from left to  
625 right. **B)** Heatmap of relative gene expression of tertiary lymphoid structures-associated genes,  
626 cytotoxic T cell-, CD8+ T cell- and CD4+ follicular helper T cell-related genes in TCGA data of uterine  
627 cancer (UCEC). Tumors are ranked according to molecular subtype.

628

629 **Figure 2. Tertiary lymphoid structures are enriched in genomically unstable uterine tumors. A)**

630 Representative images of immunohistochemistry for CD20 in molecular subgroups of uterine cancer,  
631 namely microsatellite stable (MSS), microsatellite unstable (MSI) and Polymerase Epsilon

632 Exonuclease Domain Mutated (*POLE*-EDM). **B)** Quantification of tertiary lymphoid structures (TLS) in

633 MSS, MSI and *POLE*-EDM endometrial tumors ( $***p<0.001$  and  $**p<0.01$ ). P values were calculated

634 with a Kruskal-Wallis comparison with a post-hoc Dunn's test. Error bars represent median $\pm$ range. **C)**

635 Multi-color immunofluorescence of TLS in a *POLE*-EDM tumor stained with three panels of tertiary

636 lymphoid structure markers. Peripheral node addressin (PNA $\alpha$ , marker for high-endothelial venule),

637 CD20 (B cells) and CD11c (dendritic cells) in panel 1 (top row), B cell markers CD38, CD79a and

638 CD138 in panel 2 (middle row) and T cell markers CD3, CD8 and CD103 in panel 3 (bottom row).

639

640 **Figure 3. Tertiary lymphoid structure genesets are enriched in genomically unstable uterine**

641 **tumors in TCGA**

642 Spearman correlation plots of TLS, CTL, CD8, CD4 and TFH gene signatures of ovarian, uterine, lung  
643 and breast cancer log<sub>2</sub>+1 transformed mRNA sequencing data from The Cancer Genome Atlas.

644 Relative gene expression is depicted.

645

646 **Figure 4. Sorting strategy for the identification of CD103+ and CD103- CD8+ T cells from**

647 **primary human tumors**

648 **A)** Gating strategy used to sort CD103 $\pm$  CD8+ T cells from human ovarian tumors. **B)** t-Distributed

649 Stochastic Neighbour Embedding (tSNE) of flow cytometry data of individual human ovarian tumors.



650 **C)** Relative fluorescent intensity on tSNE per flow cytometry marker, shown for individual tumors.  
651

652 **Figure 5. CD8<sup>+</sup> CD103<sup>+</sup> T cells are an exhausted T cell subtype characterized by CXCL13**

653 **expression. A)** t-Distributed Stochastic Neighbor Embedding (tSNE) of flow cytometry data of human  
654 ovarian tumors based on flow cytometric analysis of TCR $\alpha\beta$  CD3, CD4, CD8 $\alpha$ , CD8 $\beta$  CD103 and  
655 CD56. In the right panel, the colored dots mark CD103<sup>+</sup> and CD103<sup>-</sup> cells sorted for single-cell  
656 sequencing. **B)** Differential expression analysis (DESeq2) of 20-cell pool CD103<sup>+</sup> versus CD103<sup>-</sup>  
657 CD8<sup>+</sup> T cell populations. Data is shown in a Volcano plot, with log<sub>2</sub>-fold change on the x-axis and the  
658 p-value on the y-axis. The highest differentially expressed (DE) genes in both the CD103<sup>-</sup> and the  
659 CD103<sup>+</sup> populations are highlighted. **C)** Inset of differentially expressed genes from panel B. DE  
660 genes involved in T cell activation and exhaustion are highlighted (green, all p-value <0.01 and a  
661 log<sub>2</sub>-fold change >2). CXCL13 is highlighted in red. As an internal control ITGAE, the gene encoding  
662 CD103, is depicted in pink. **D)** Gene-expression (Fragments Per Kilobase of transcript per Million  
663 mapped reads, FPKM) in CD103<sup>+</sup> (blue) and CD103<sup>-</sup> (orange) CD8<sup>+</sup> single-cells. Differences were  
664 determined by a Mann-Whitney U test.

665

666 **Figure 6. CD103<sup>+</sup>CXCL13<sup>+</sup> T cells are induced by activation of CD8<sup>+</sup> T cells in the presence of**

667 **TGF- $\beta$ .** **A)** Tumor-infiltrating CD103<sup>+</sup> CD8<sup>+</sup> cells were sorted from human high-grade serous ovarian  
668 tumors (HGSOC) (n=3), cells were cultured in medium and stimulated with phorbol myristate acetate  
669 (PMA) and ionomycin, Dynabeads ( $\alpha$ CD3/ $\alpha$ CD28-T cell activation beads) or remained unstimulated.  
670 CXCL13 production was measured by sandwich ELISA (pg/mL)(\*p<0.05). P-values were calculated  
671 using a Kruskal-Wallis comparison with a post-hoc Dunn's test. Error bars represent mean+SEM **B)**  
672 CD8<sup>+</sup> T cells were sorted from peripheral blood of healthy donors by negative selection magnetic  
673 activated cell sorting (n=4, analyzed in duplicate). CD8<sup>+</sup> T cells were cultured in medium with or  
674 without Dynabeads ( $\alpha$ CD3/ $\alpha$ CD28-T cell activation beads), recombinant TGF- $\beta$ 1 and/or TGF- $\beta$ 1  
675 receptor inhibitor SB431542. Expression of CD103 was assessed by flow cytometry **C)** CD8<sup>+</sup> T cells  
676 from healthy donors were obtained as described for panel B and cultured with TGF- $\beta$  or SB431532 or  
677 a combination of these. CXCL13 production was measured by sandwich ELISA (pg/mL)(n=4,  
678 analyzed in duplicate) (\*p<0.05). P-values were calculated using a Kruskal-Wallis comparison with a  
679 post-hoc Dunn's test. Error bars represent mean+SEM **D)** CD8<sup>+</sup> T cells were cultured as described

680 for panel B, with the addition of IL-2 in the culture medium. CXCL13 production was measured by  
681 sandwich ELISA (pg/mL) (\*\* $p < 0.01$ ). P-values for were calculated using a one-way ANOVA with a  
682 Kruskal-Wallis comparison. Error bars represent mean+SEM. **E** CD8+ T cells from healthy donors  
683 were cultured with concentrations of recombinant TGF- $\beta$ 1 ranging from 0 to 100 ng/mL in medium  
684 with or without Dynabeads ( $\alpha$ CD3/ $\alpha$ CD28-T cell activation beads) and CXCL13 production (pg/mL)  
685 was measured by sandwich ELISA (n=3, analyzed in duplicate) (\*\*\*\* $p < 0.0001$ , \* $p < 0.05$ ). P-values  
686 were calculated using a two-way ANOVA followed by a post-hoc Bonferroni test. Error bars represent  
687 mean+SEM **F-G**) CD8+ T cells were sorted from healthy donors by negative selection magnetic  
688 activated cell sorting (n=3). CD8+ T cells were cultured in medium alone, with addition of TGF- $\beta$  or  
689 Dynabeads, or a combination of these. Chemokine arrays were used to assess chemokine production  
690 in harvested supernatants. Representative images of chemokine array membranes (F) and  
691 densitometric analysis used to quantify chemokine production per conditions are depicted as a  
692 function of mode of activation (G) (\*\* $p < 0.01$ , \* $p < 0.05$ ). P-values were calculated using a Kruskal-  
693 Wallis test with post-hoc Dunn's test. Error bars represent mean+SD.

694

695 **Figure 7. Tertiary lymphoid structures are abundant in CD103<sup>+</sup>CD8<sup>+</sup> T cell-enriched tumors**

696 Spearman correlation plots of TLS, CD103<sup>+</sup>CD8<sup>+</sup> and CD103<sup>-</sup>CD8<sup>+</sup> gene signatures of ovarian,  
697 uterine, lung and breast cancer log<sub>2</sub>+1 transformed mRNA sequencing data from The Cancer  
698 Genome Atlas. Relative gene expression is depicted.

Figure 1

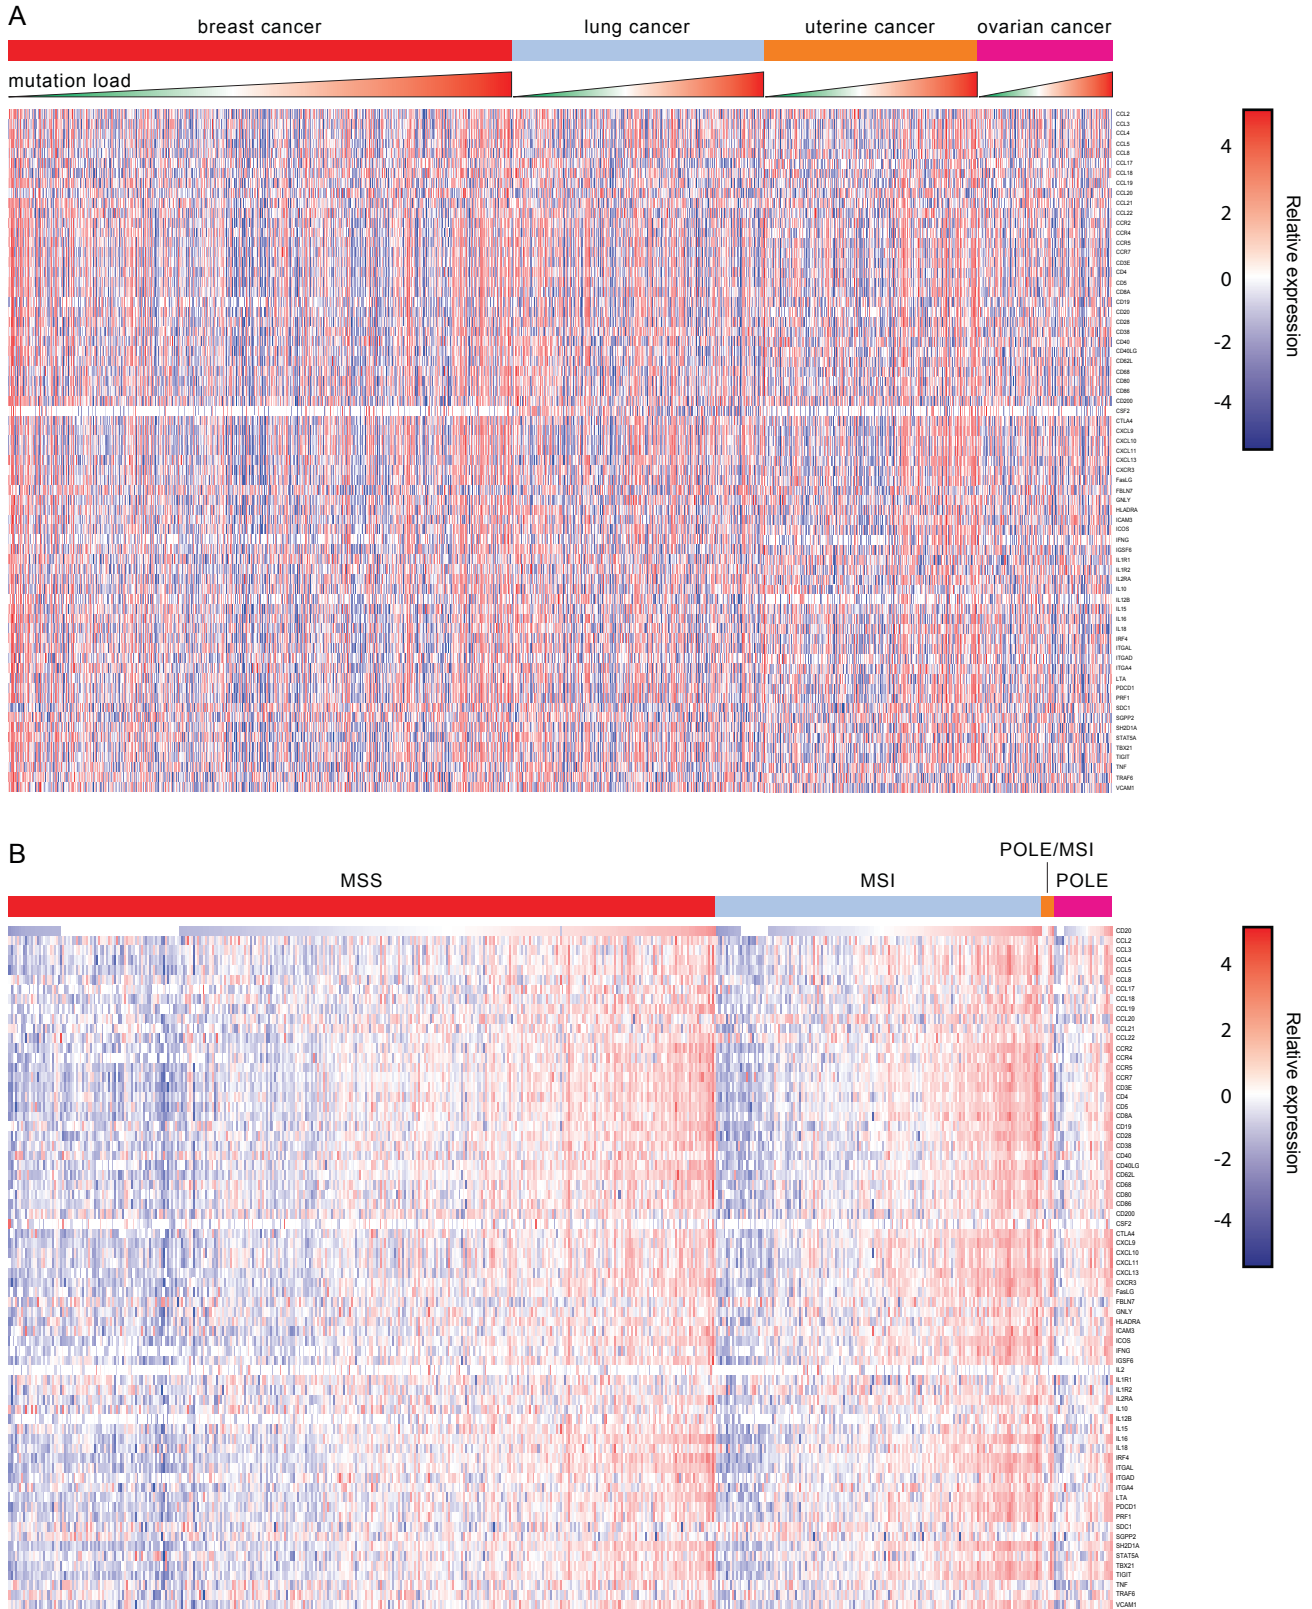

Figure 2

A

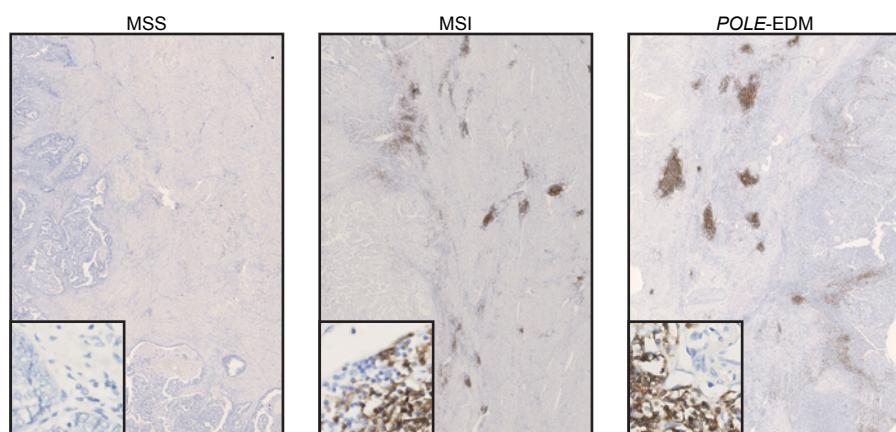

B

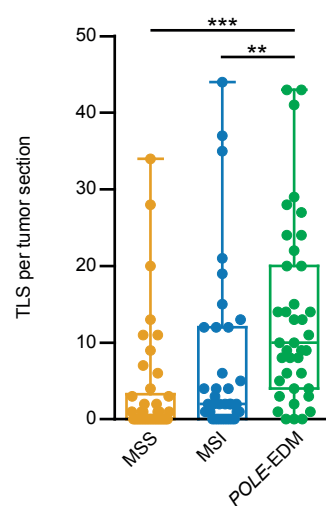

C

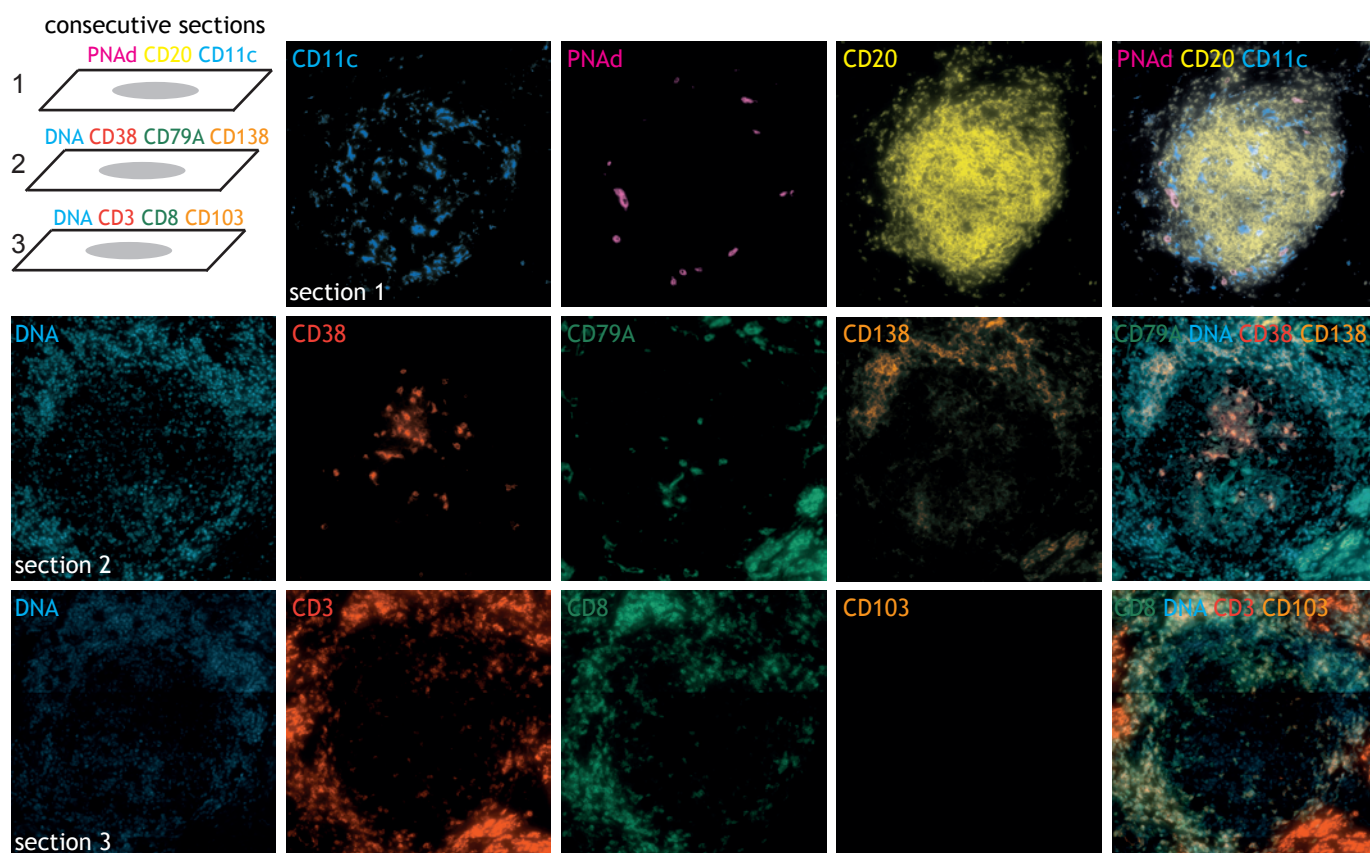



Figure 3

A

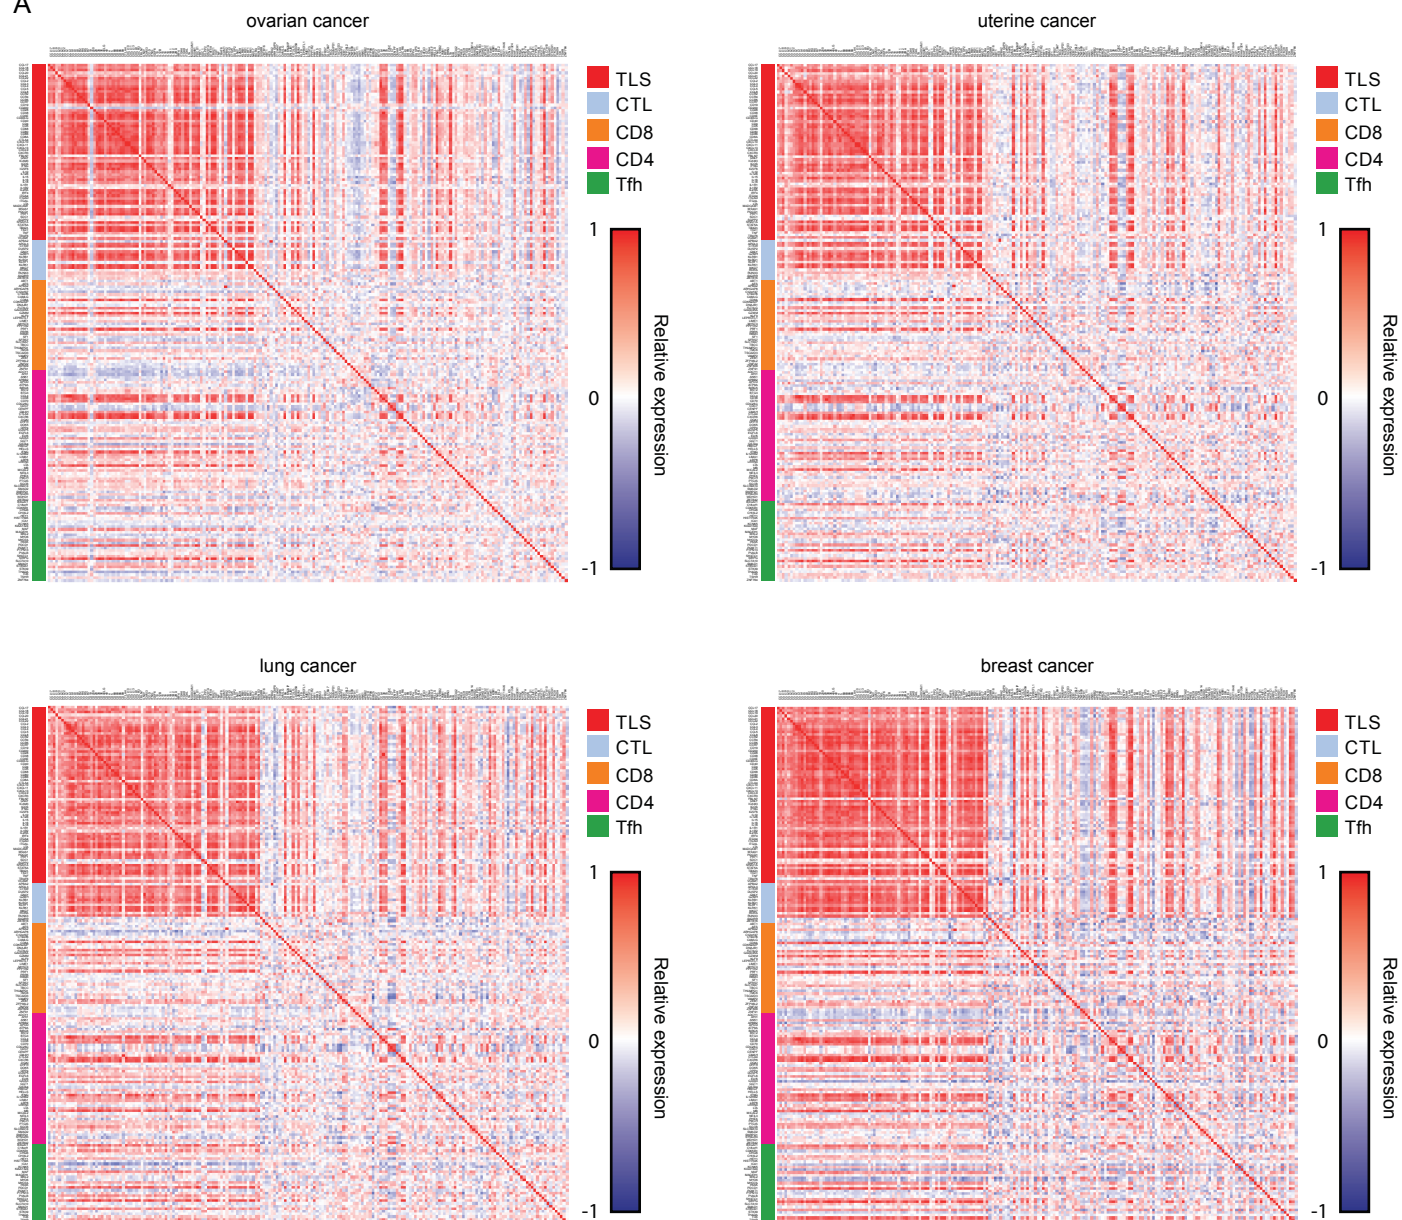

Figure 4

A

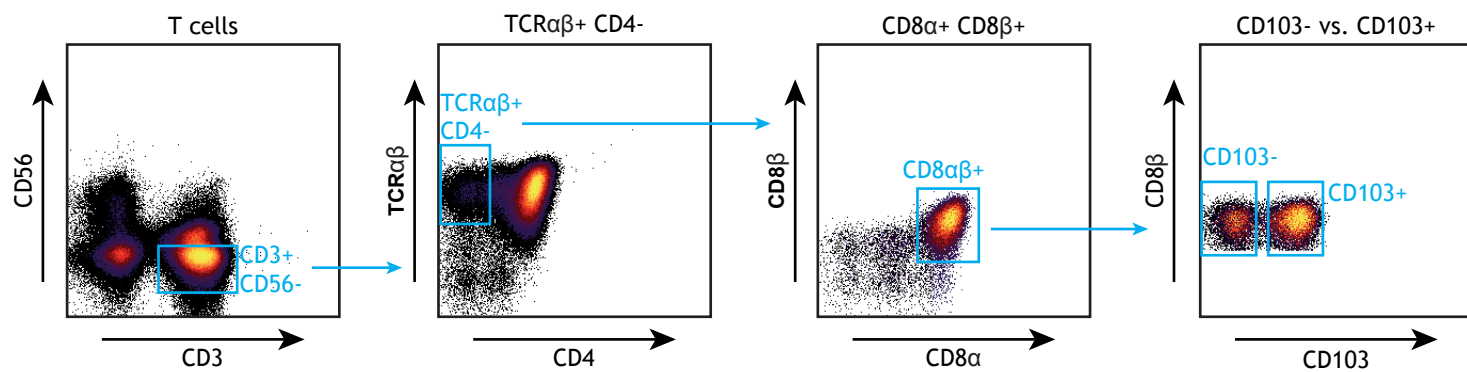

B

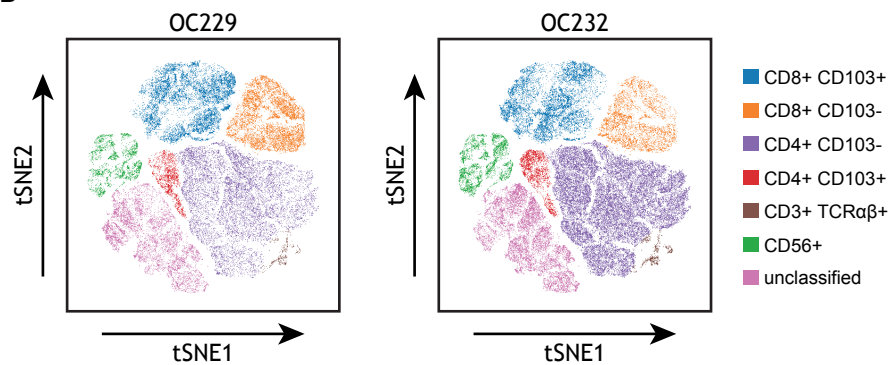

C

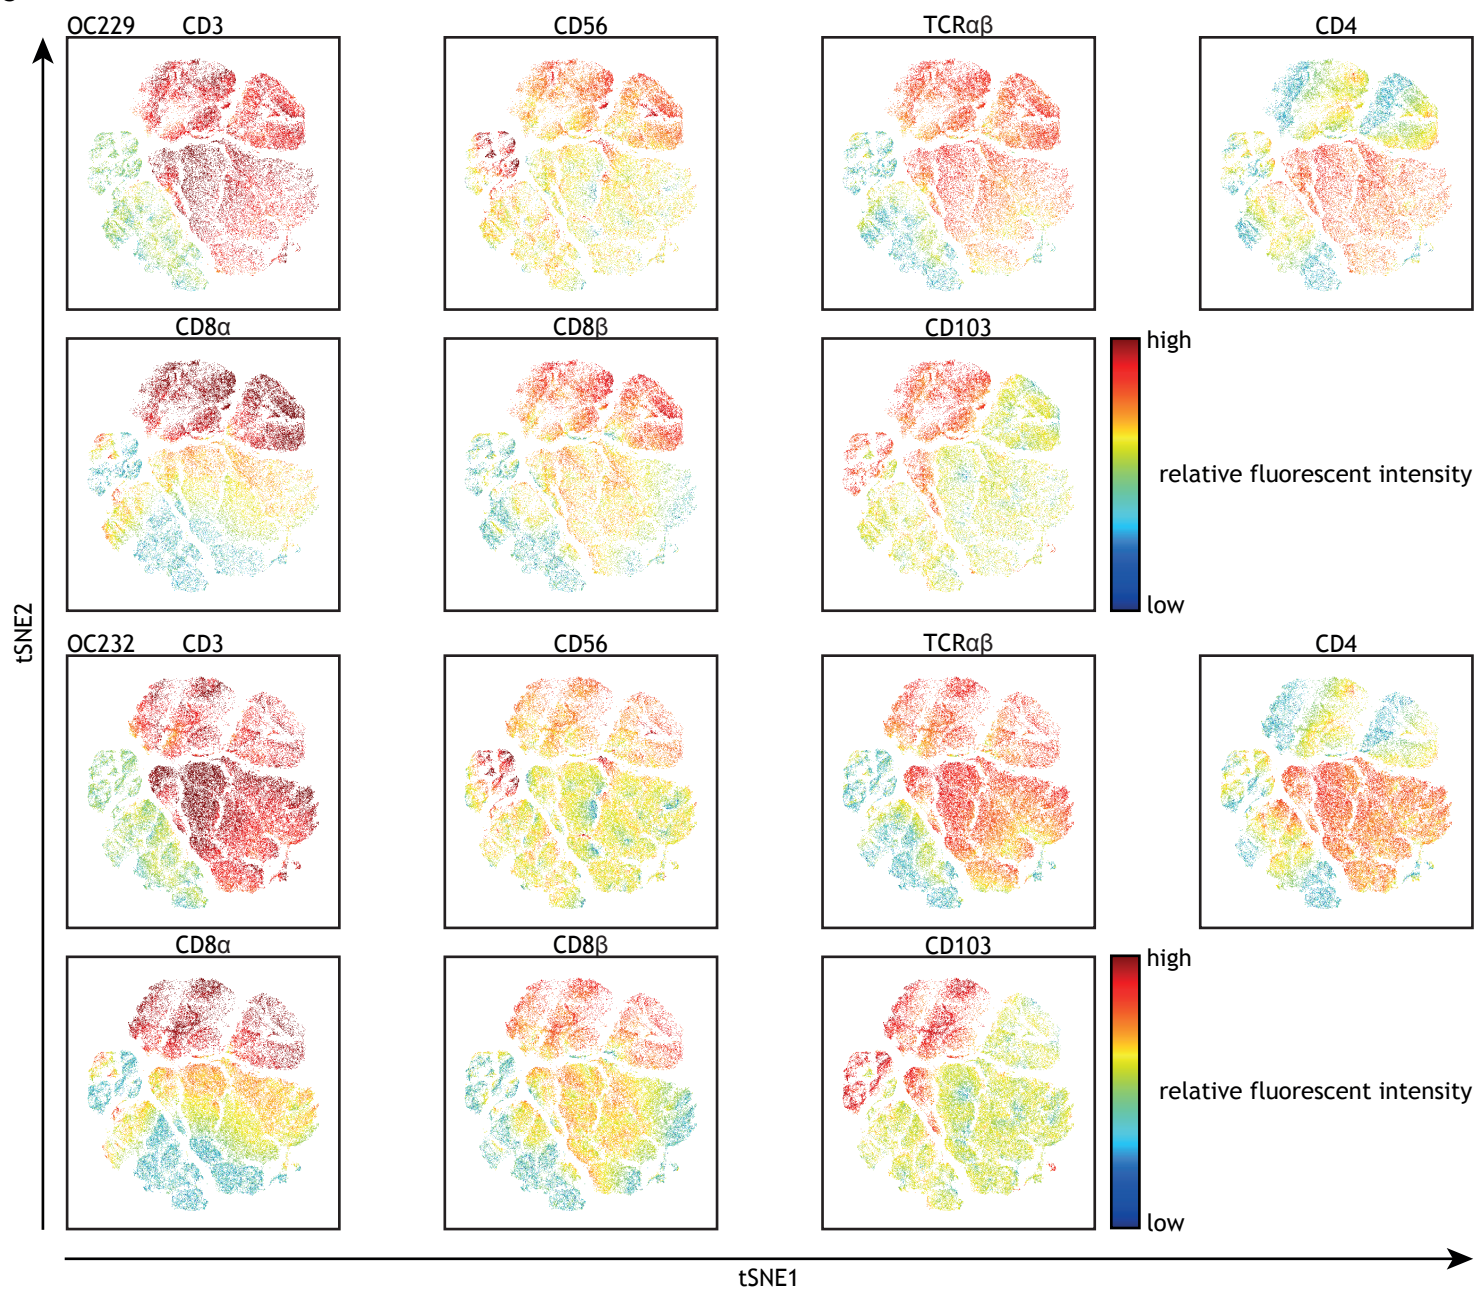

Figure 5

A

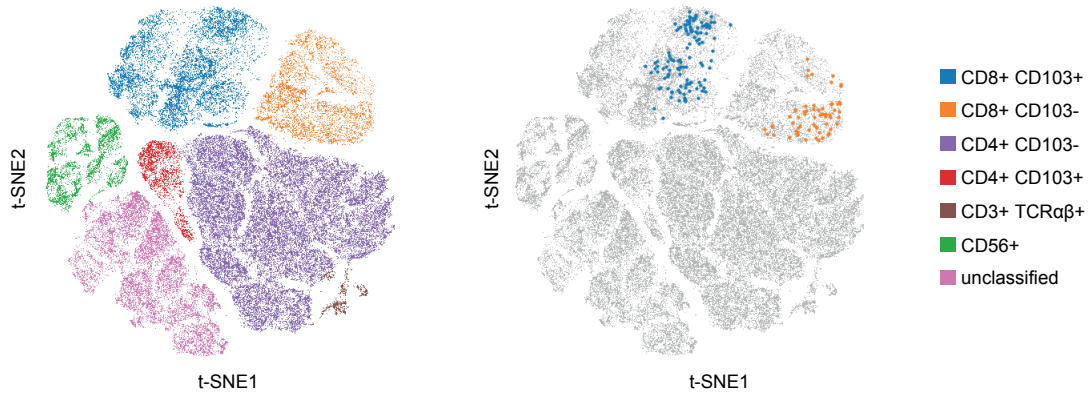

B

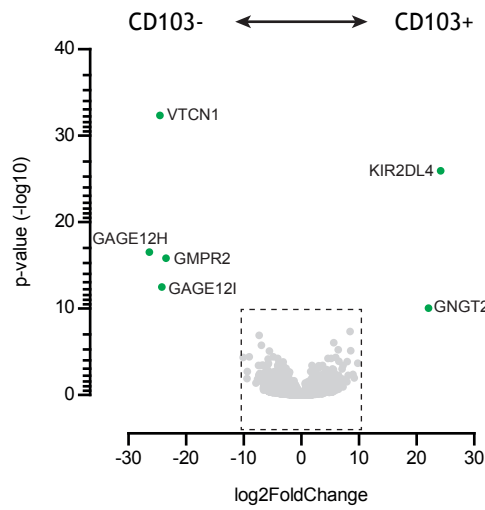

C

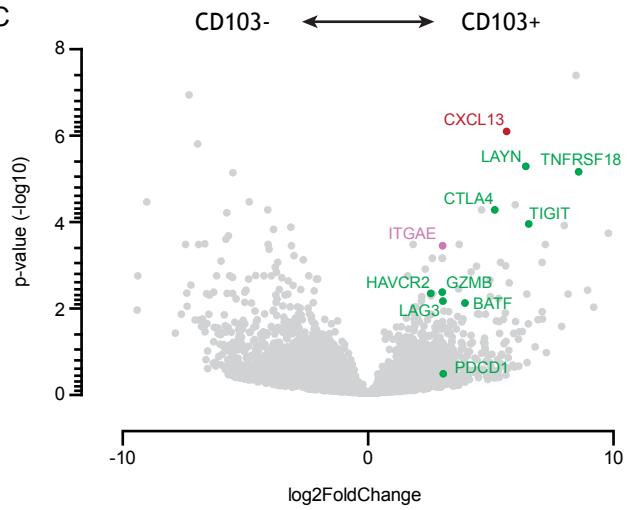

D

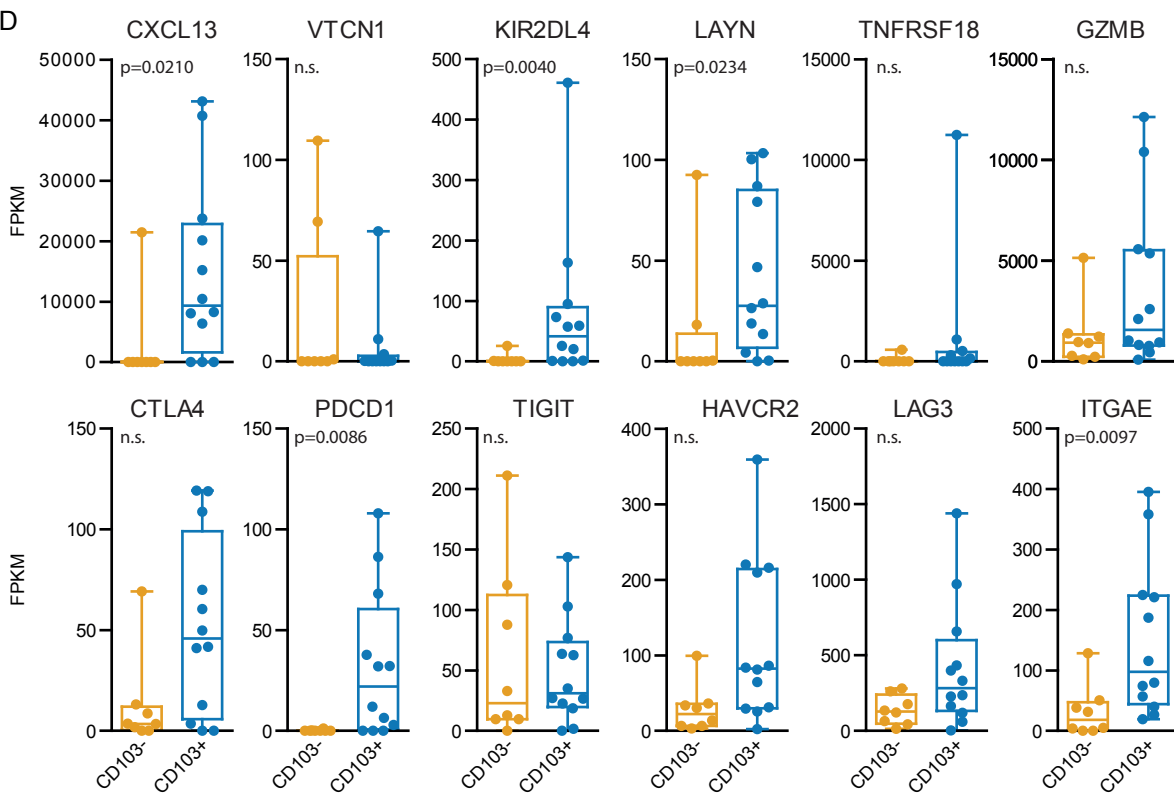



Figure 6

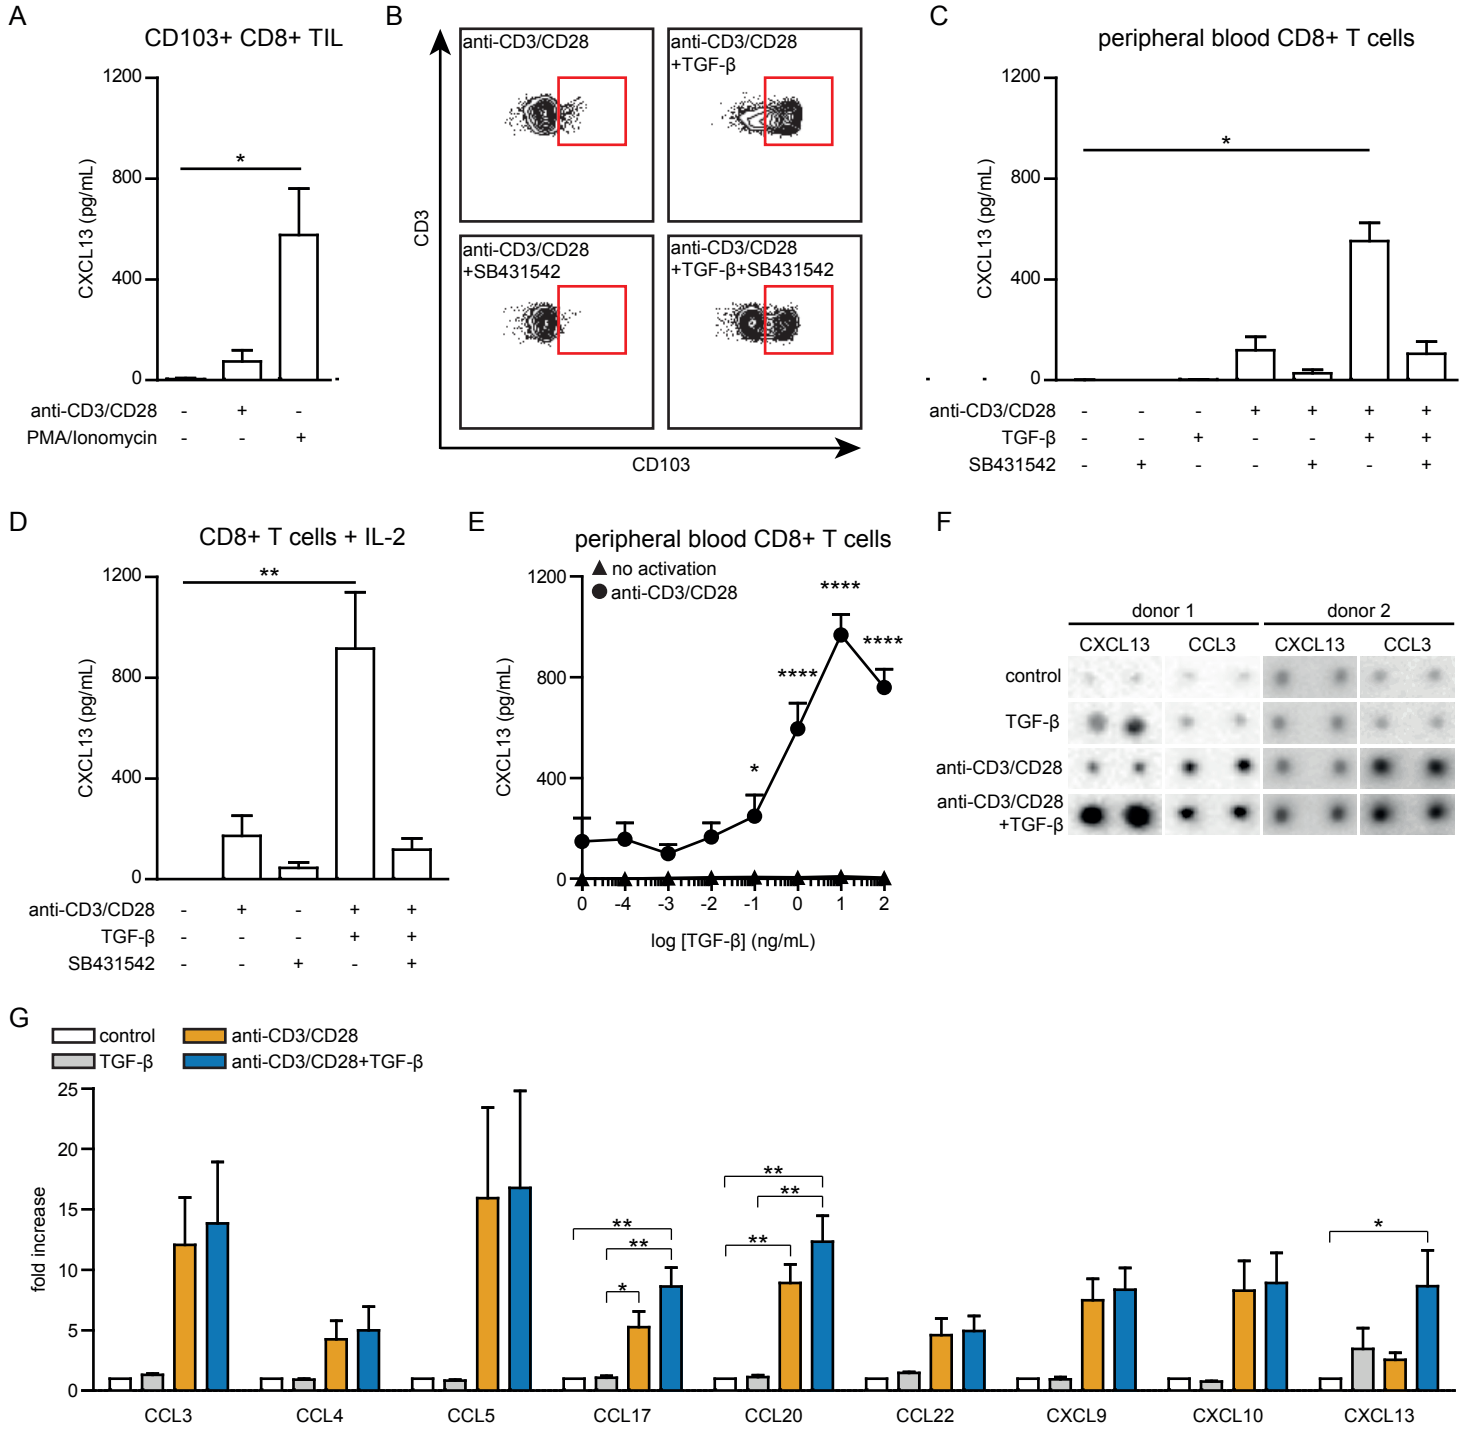



Figure 7

ovarian cancer

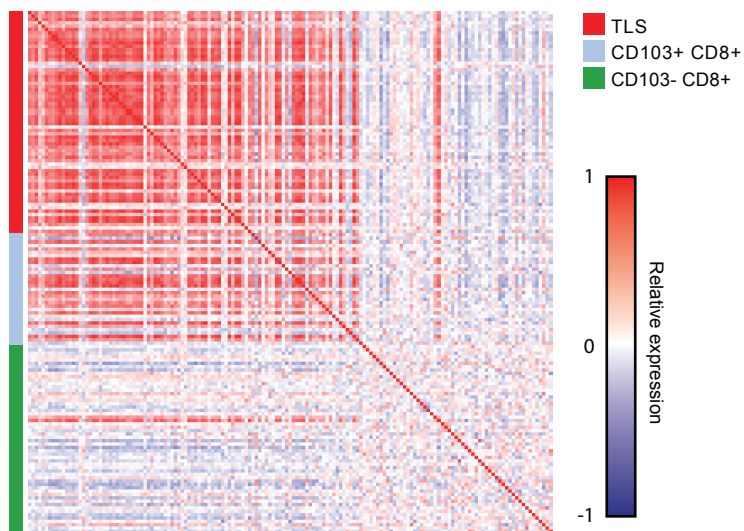

uterine cancer

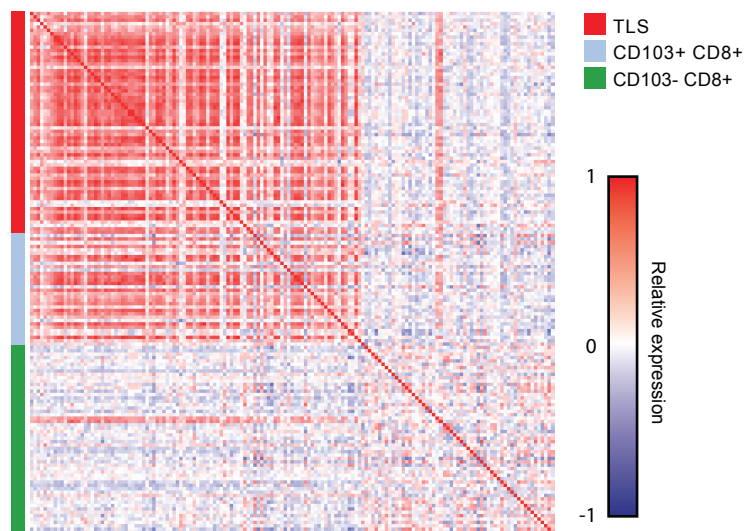

lung cancer

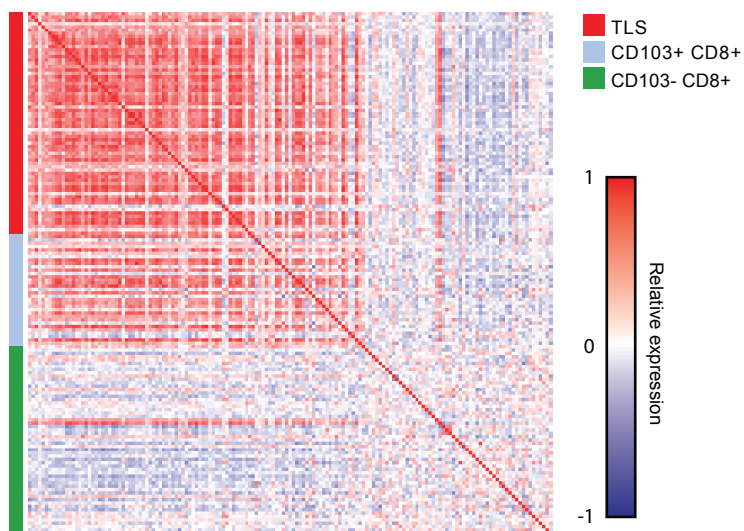

breast cancer

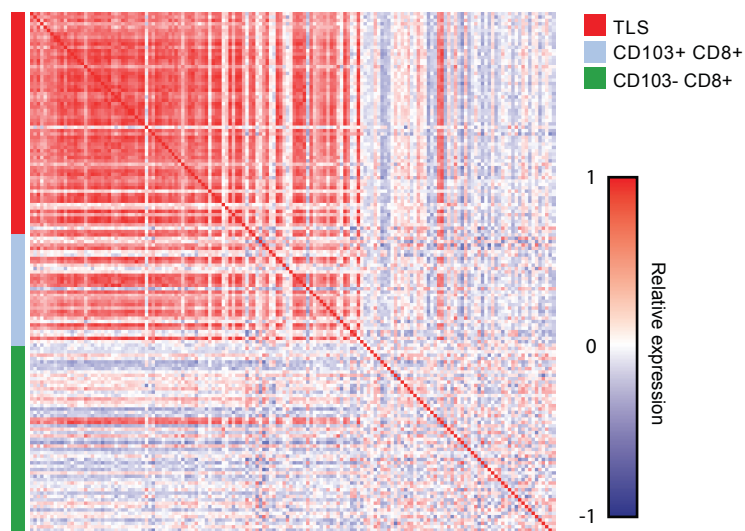

Source: https://www.biorxiv.org/content/10.1101/303834v1.full.pdf
